# Supplementary material for: The genomic landscape of malignant peripheral nerve sheath tumors: diverse drivers of Ras pathway activation
Source: PubMed Central journal article supplement (PMC5678116; doi:10.1038/s41598-017-15183-1), 2017-11-08
Supplement: 41598_2017_15183_MOESM1_ESM.pdf [file 41598_2017_15183_MOESM1_ESM.pdf]

The genomic landscape of malignant peripheral nerve sheath tumors: diverse drivers of Ras pathway activation

\*Andrew S Brohl<sup>1,2</sup>, Elliot Kahen<sup>3</sup>, Sean J Yoder<sup>4</sup>, Jamie K Teer<sup>5</sup>, and Damon R Reed<sup>1,2,3</sup>

<sup>1</sup>Sarcoma Department, <sup>2</sup>Chemical Biology & Molecular Medicine Program, <sup>3</sup>Sunshine Project Translational Research Laboratory, <sup>4</sup>Molecular Genomics Core Facility, and <sup>5</sup>Department of Biostatistics and Bioinformatics, H. Lee Moffitt Cancer Center and Research Institute, Tampa, FL.

\*corresponding author:

Andrew S. Brohl, MD

12902 Magnolia Drive

Tampa, FL 33612-9416

813-745-3242 (o)

813-745-8337 (f)

andrew.brohl@moffitt.org

# Figure S1: Mutation signatures: in-house samples

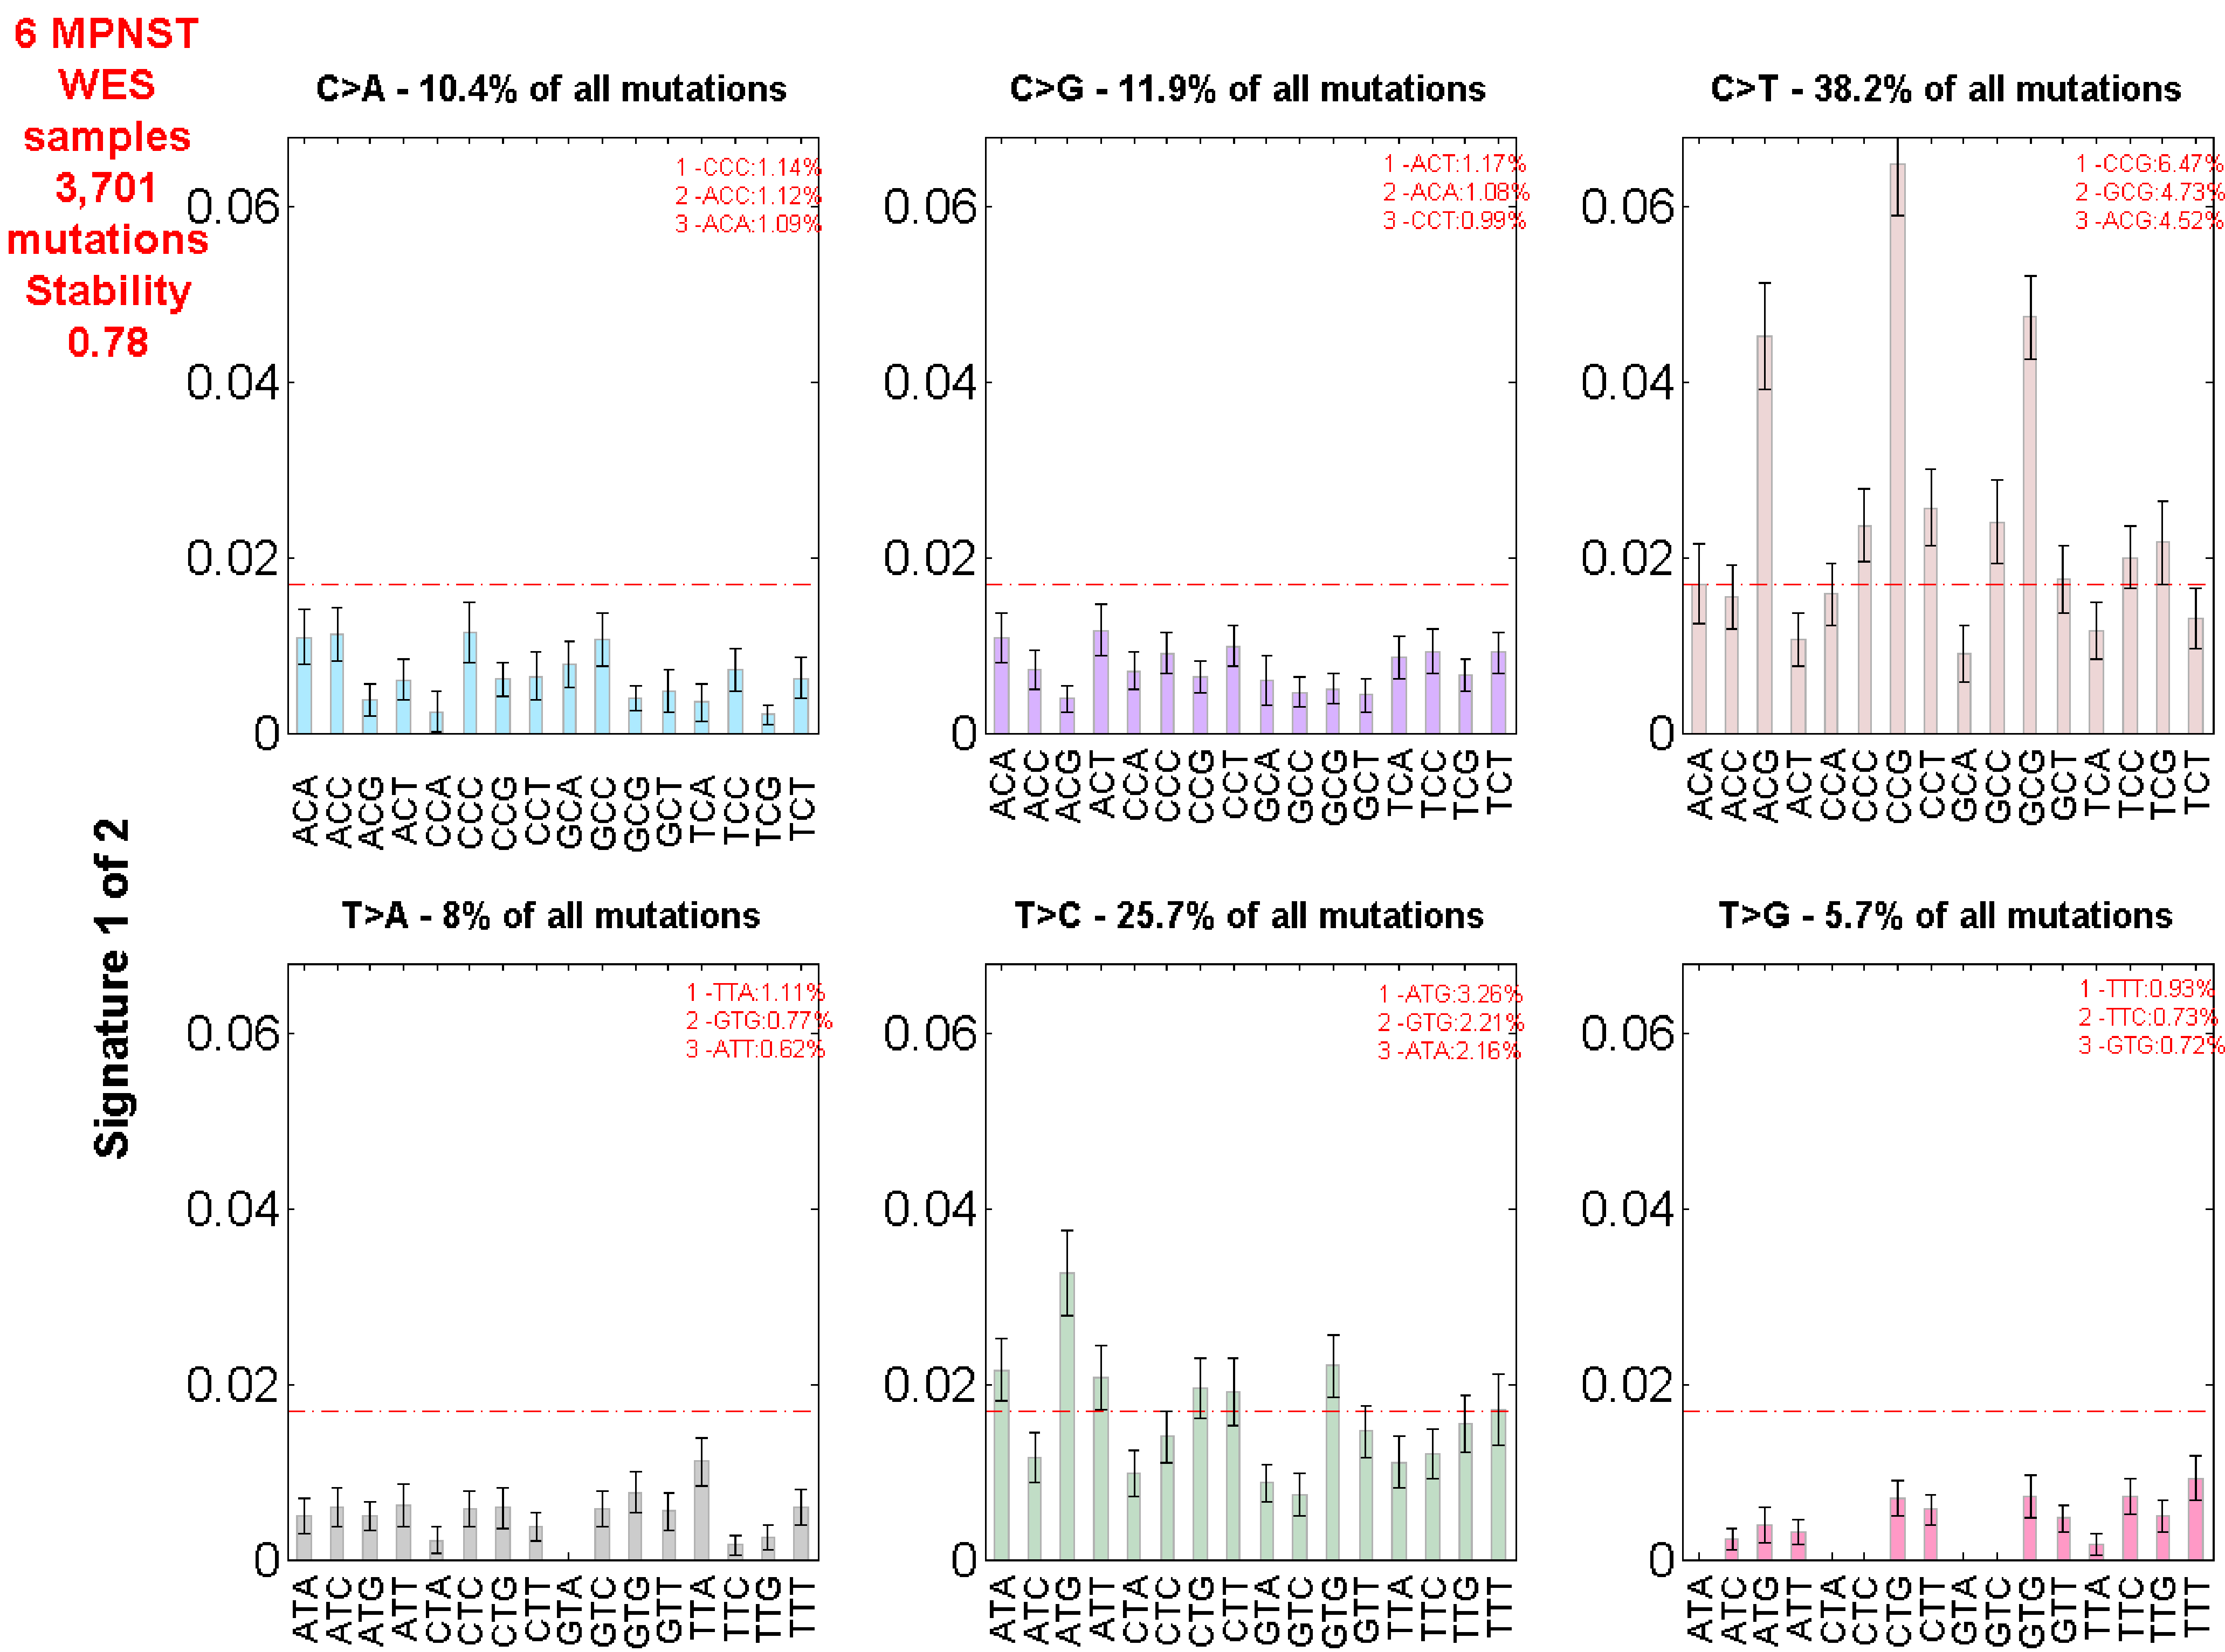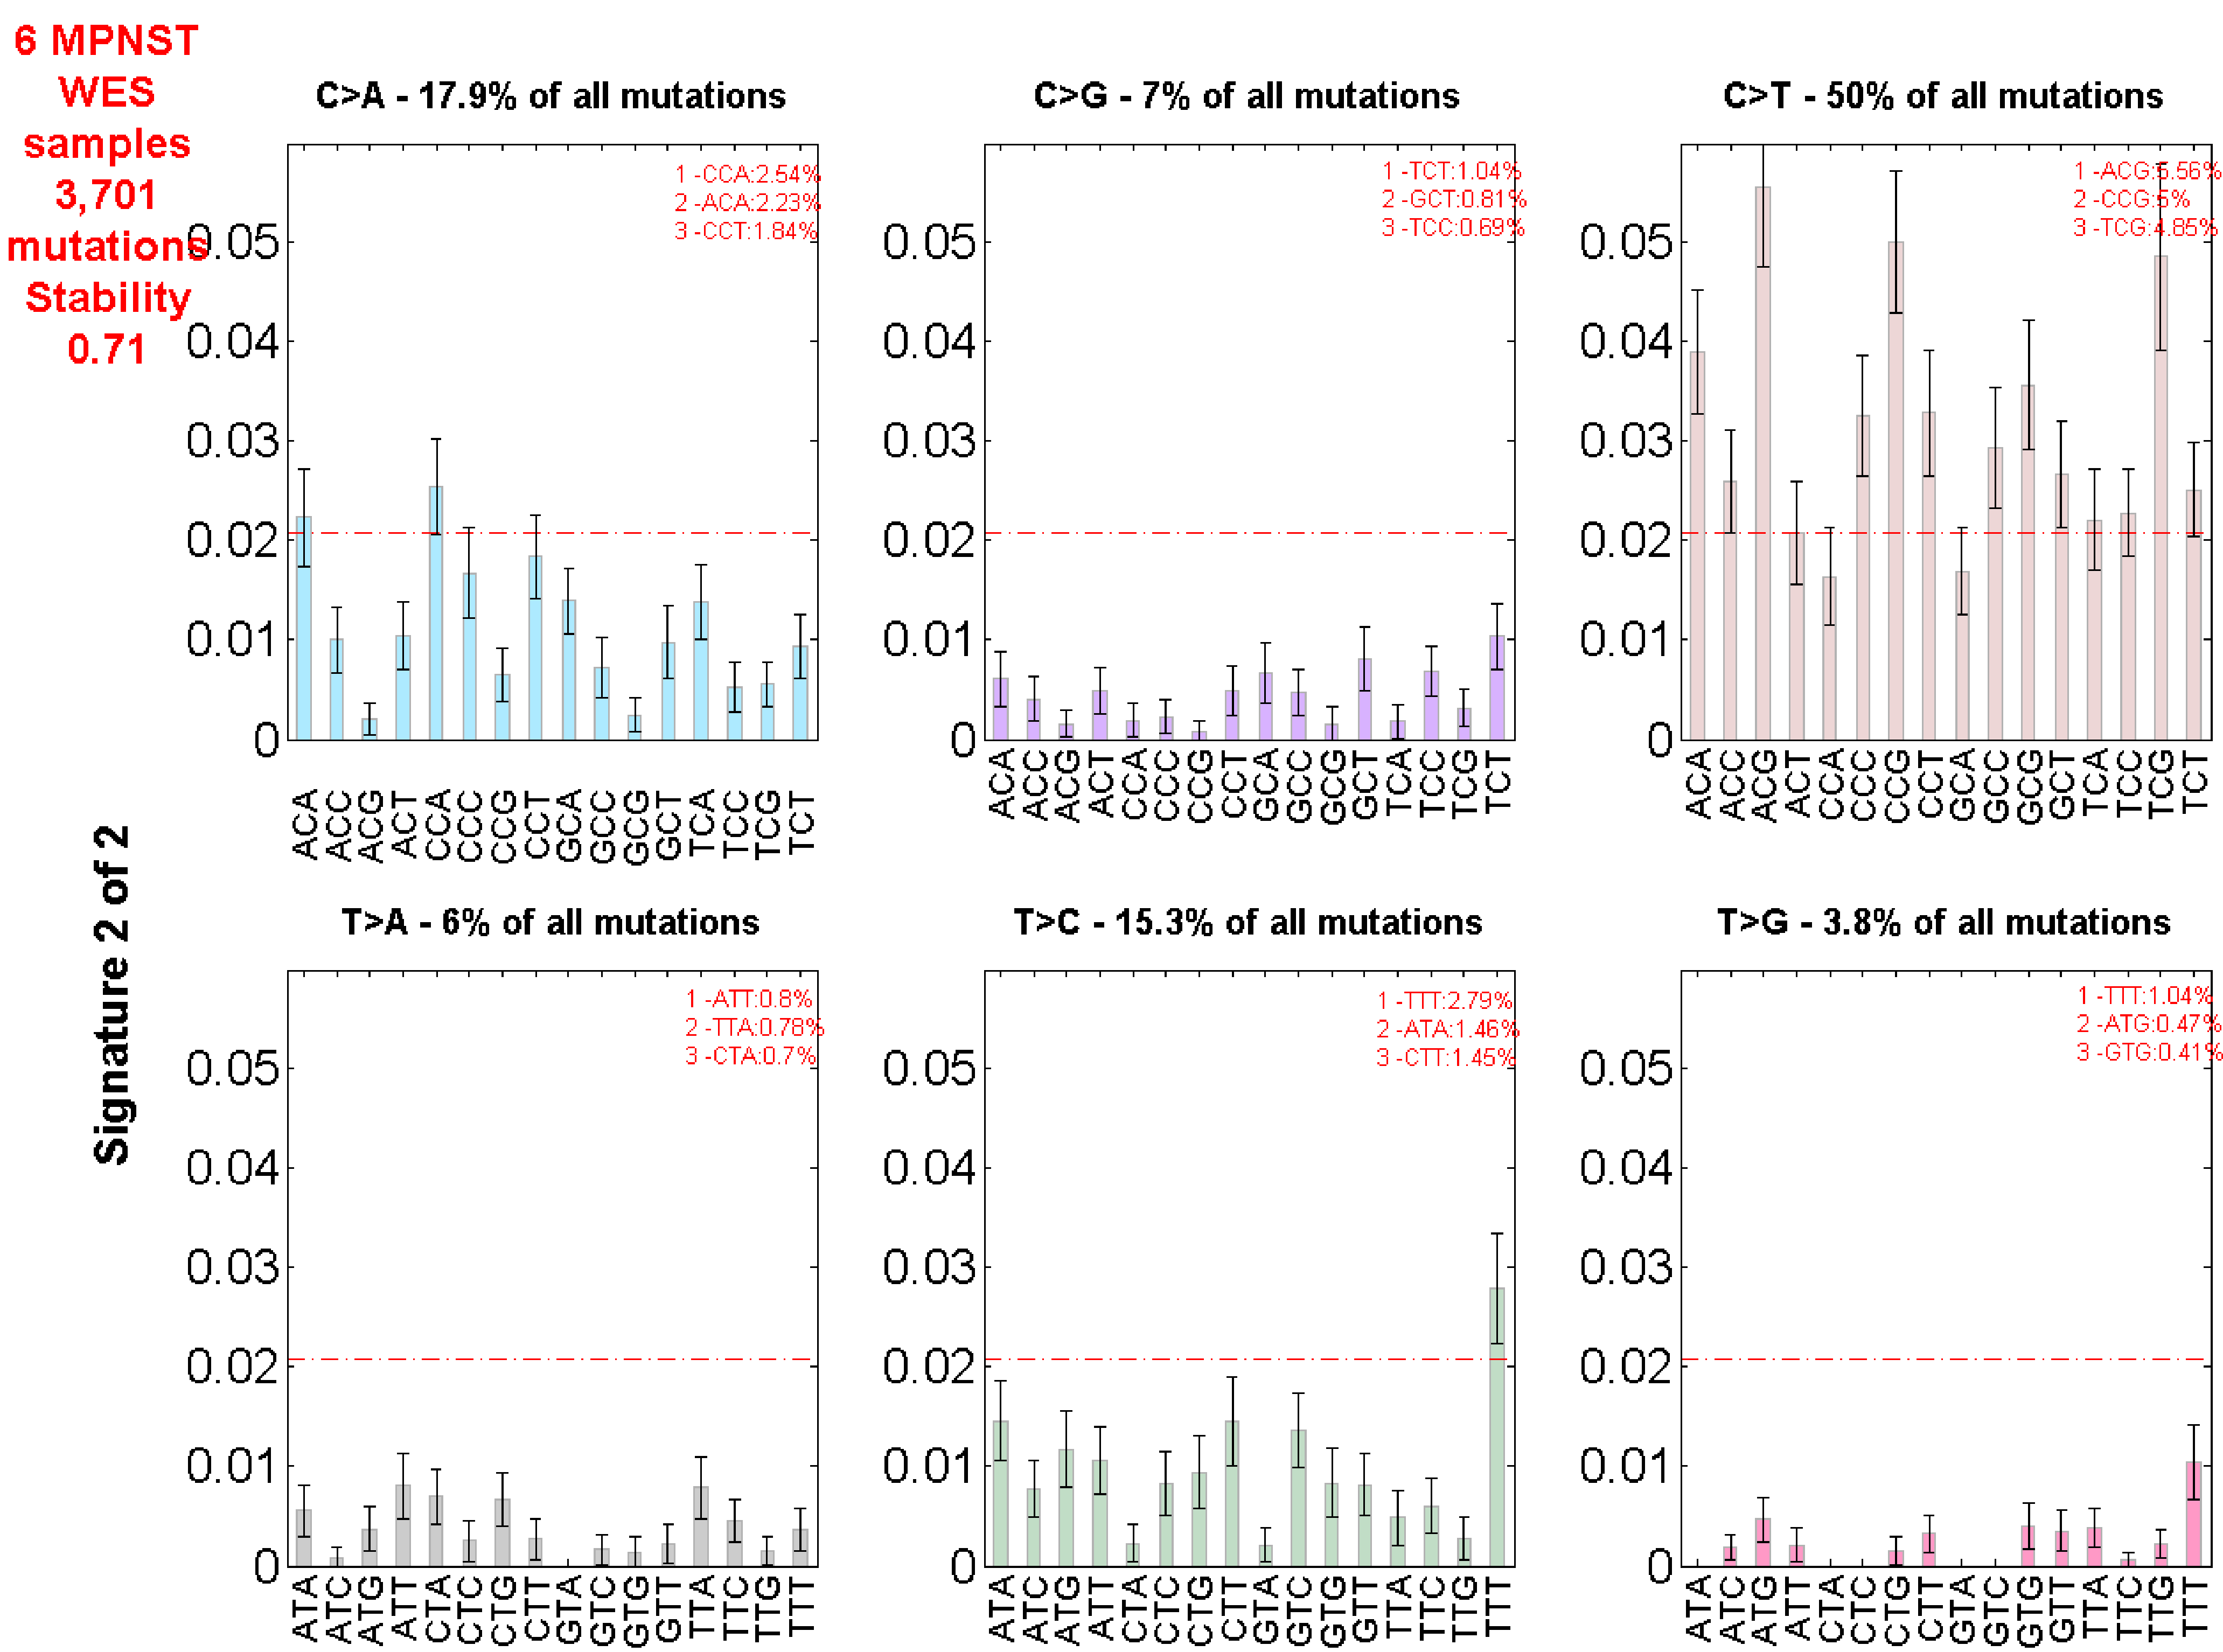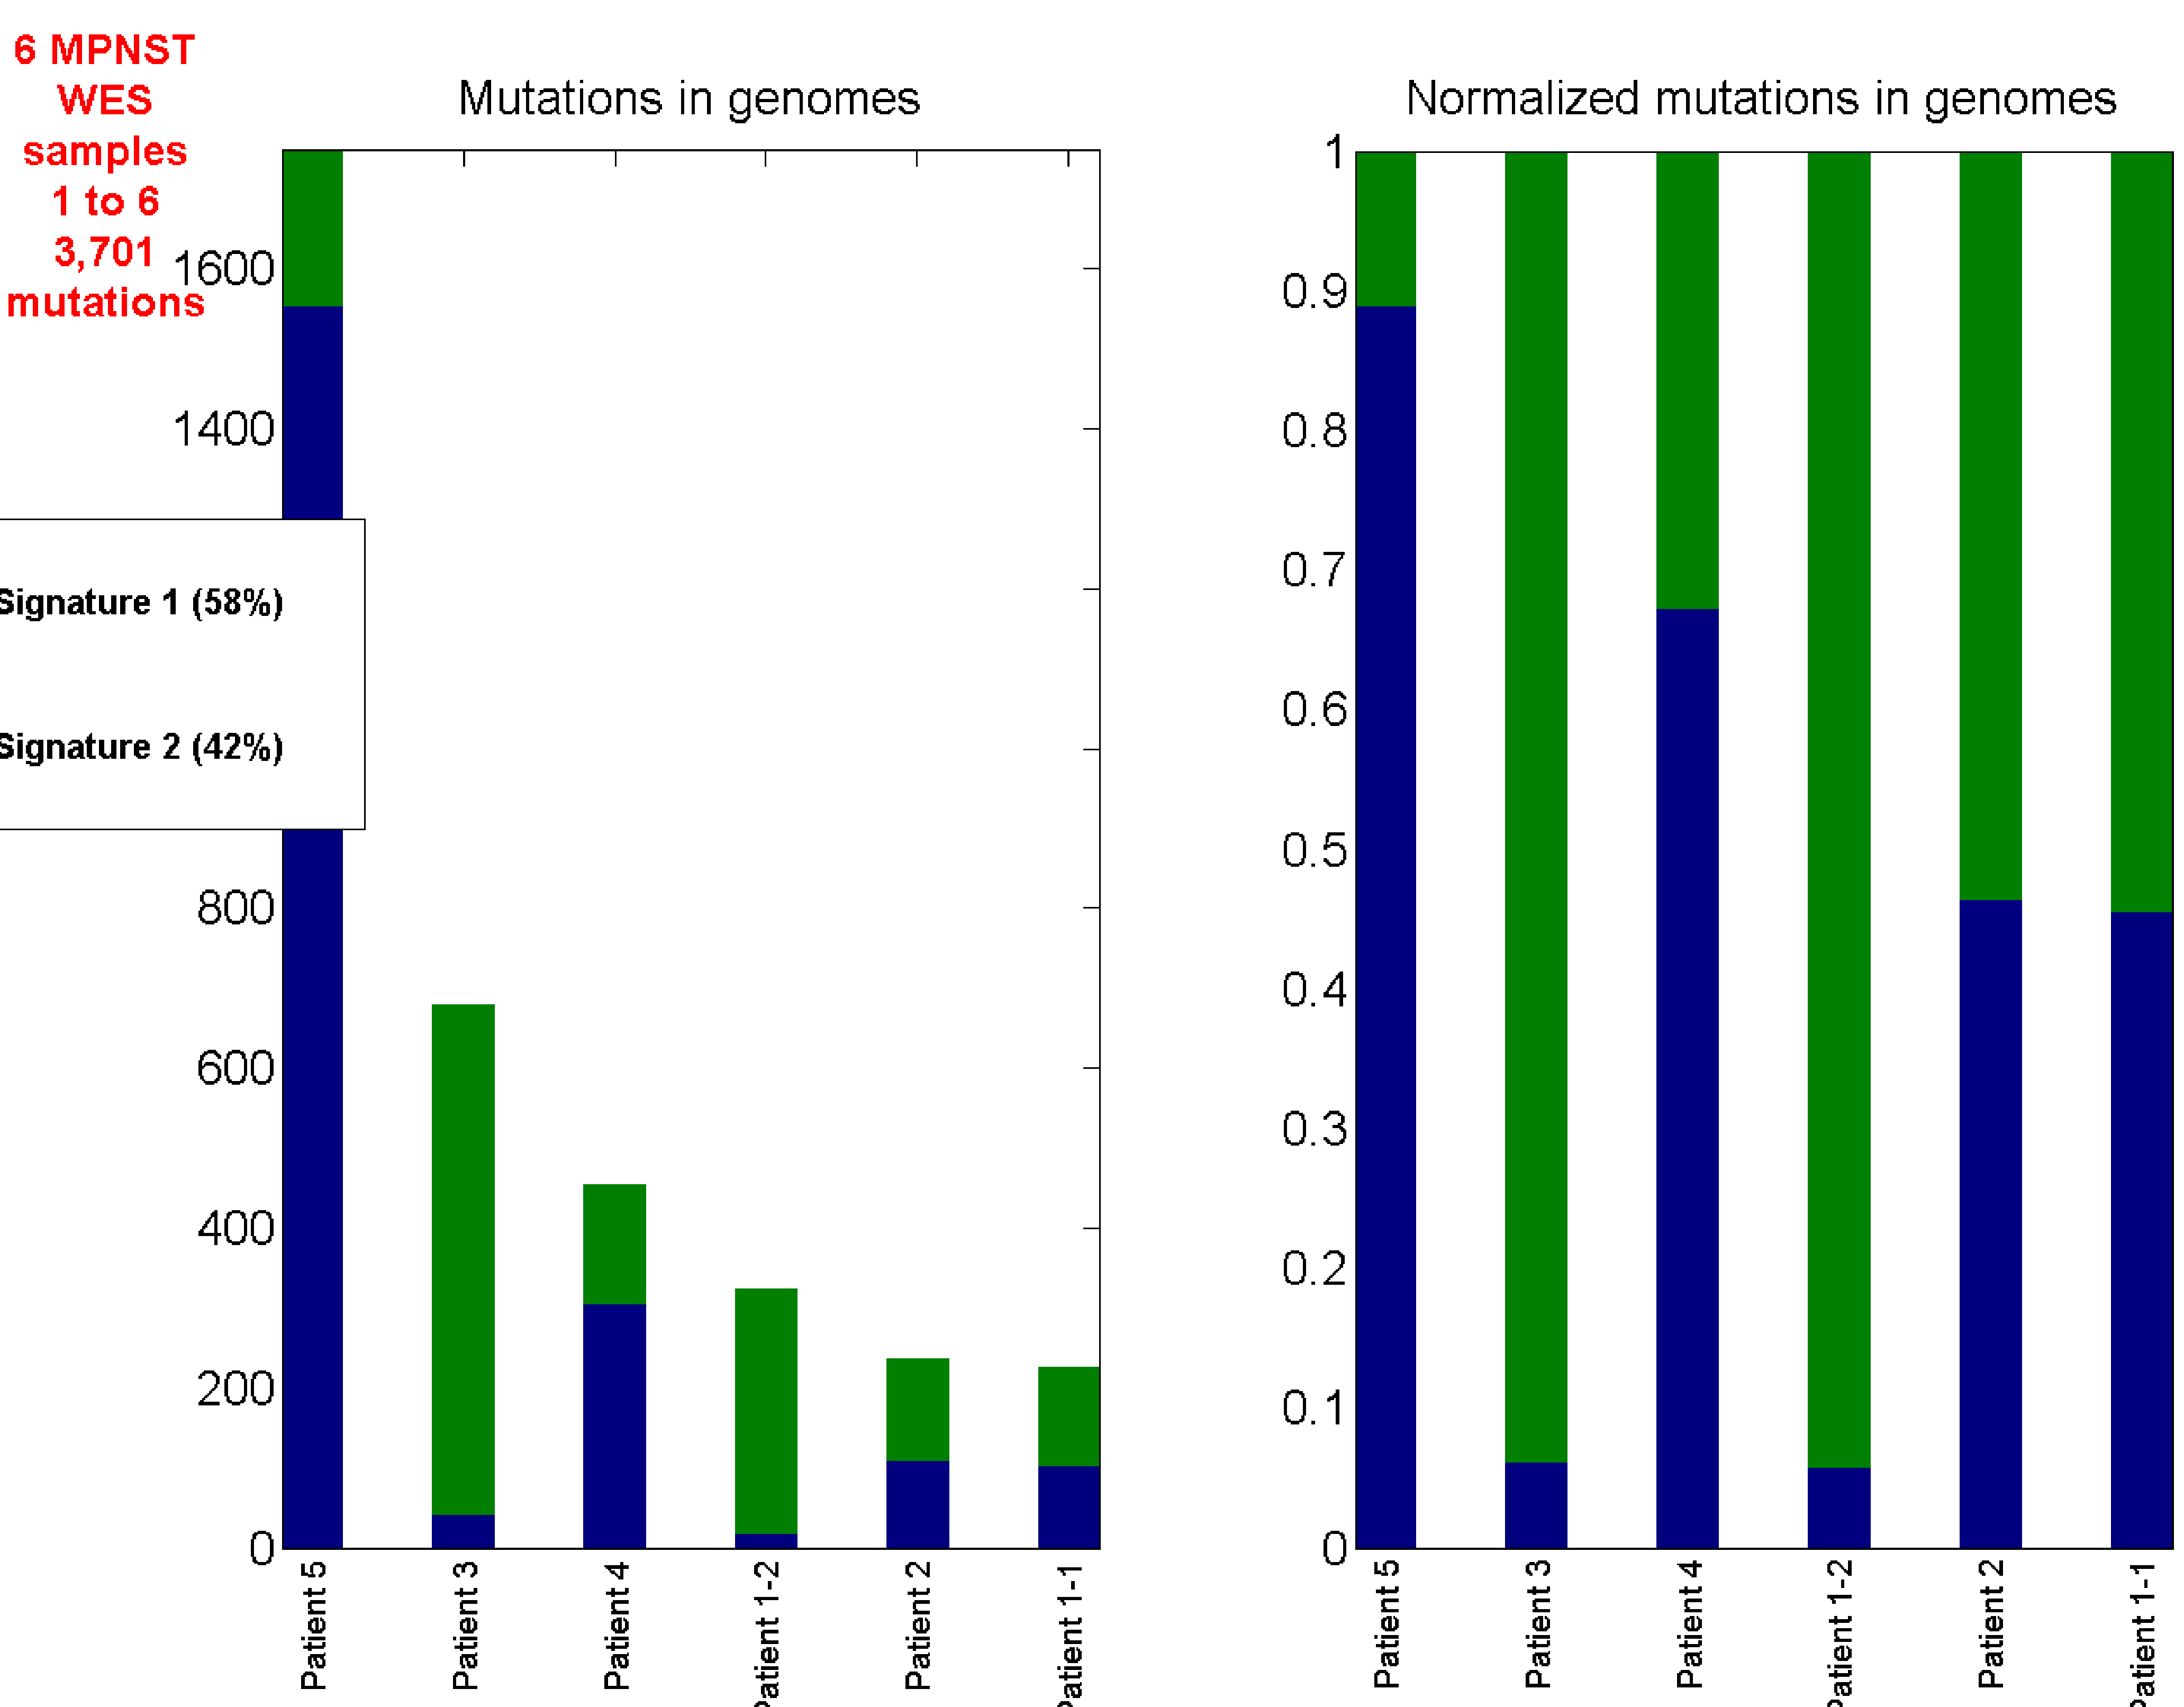

# Figure S2: Mutation signatures: TCGA samples

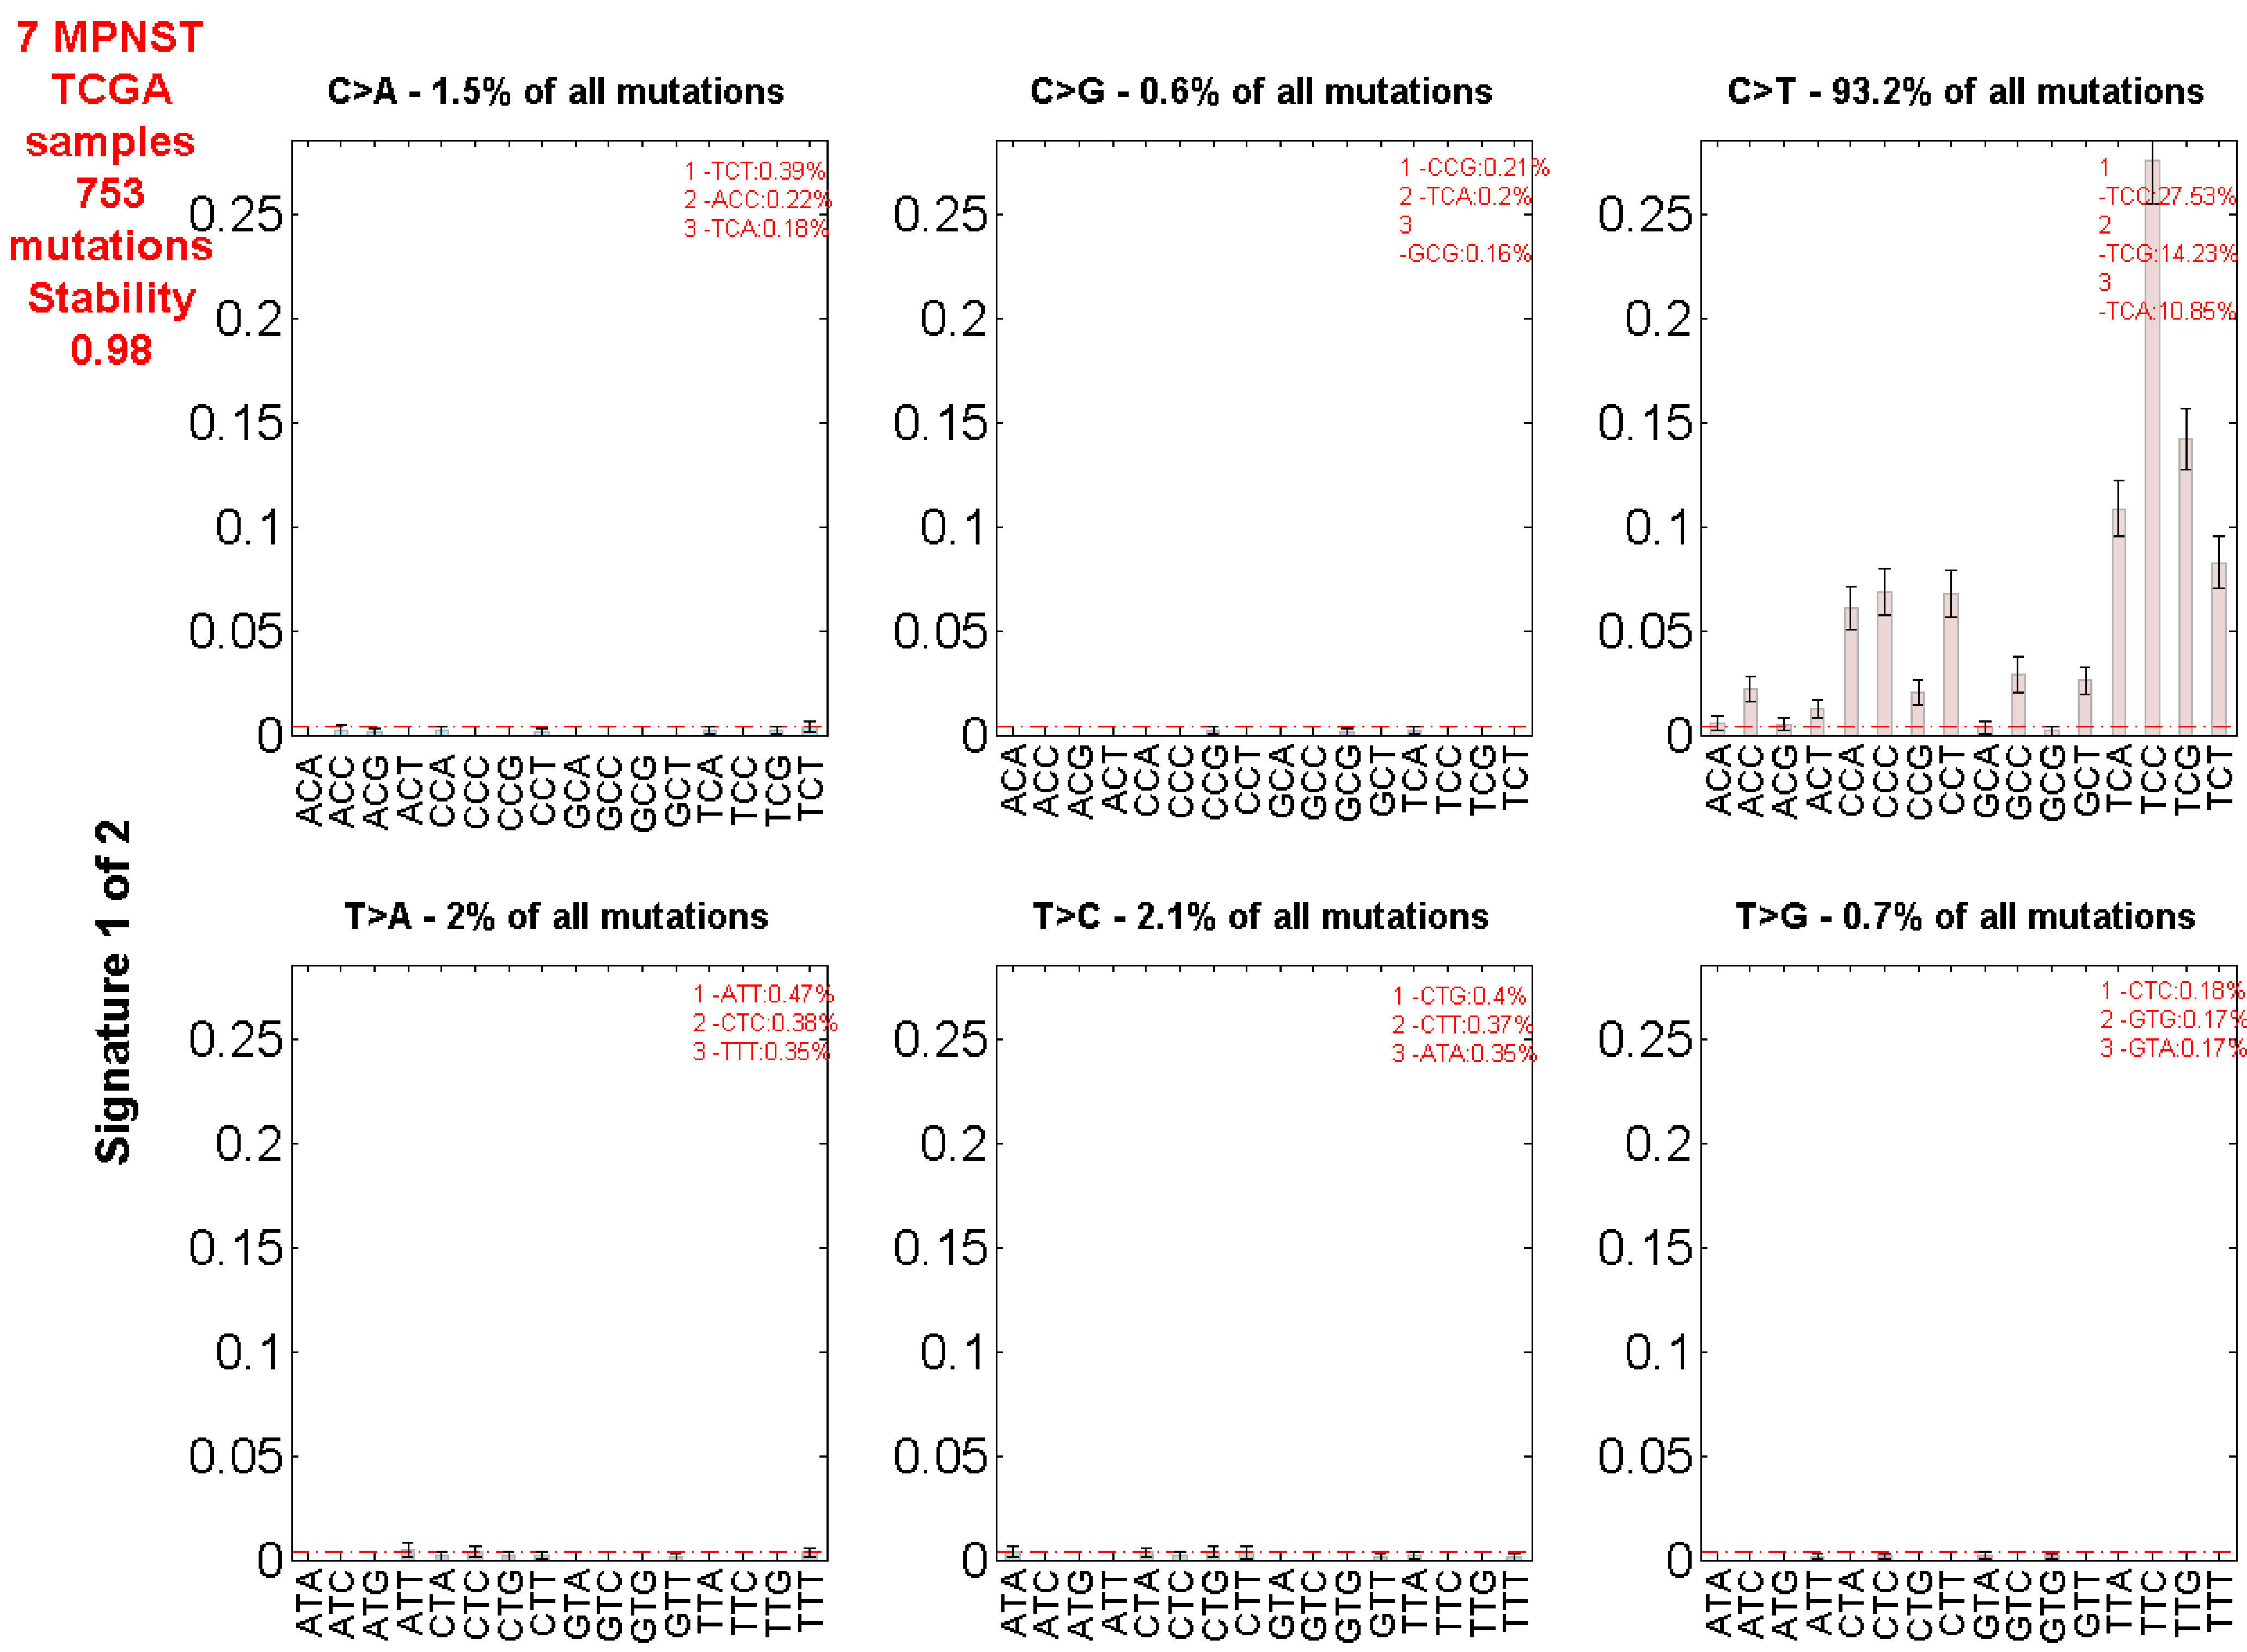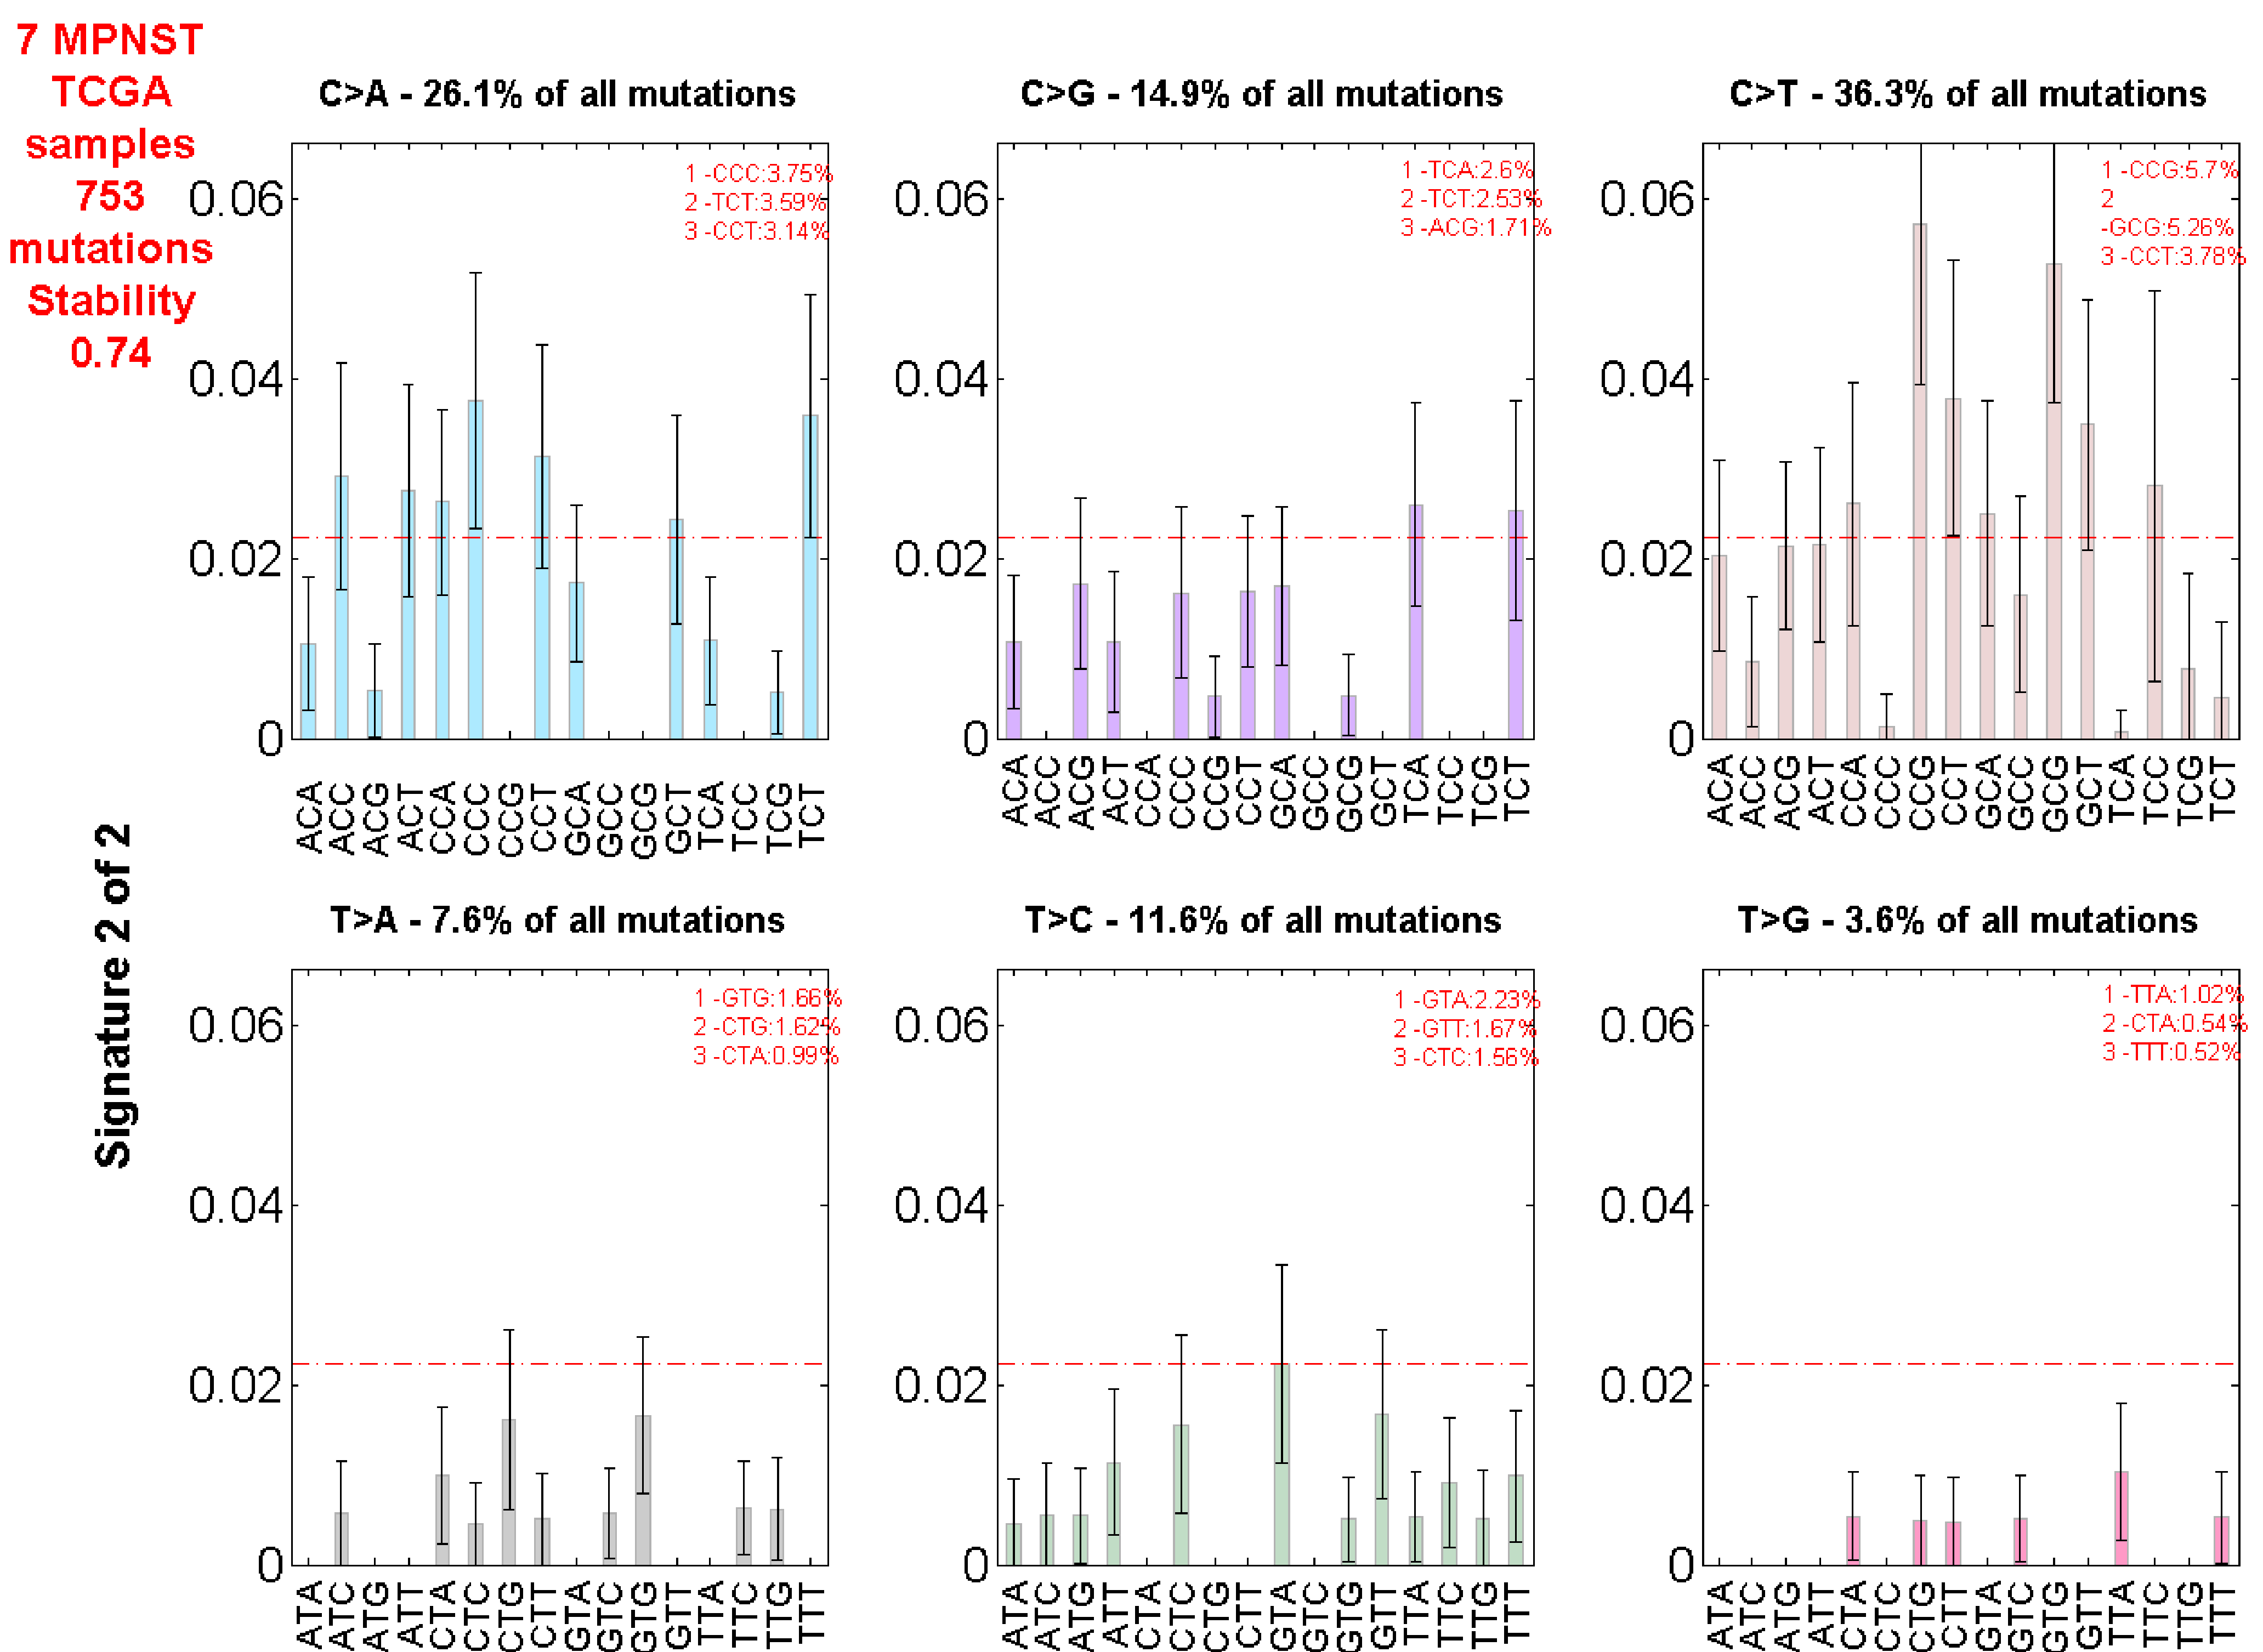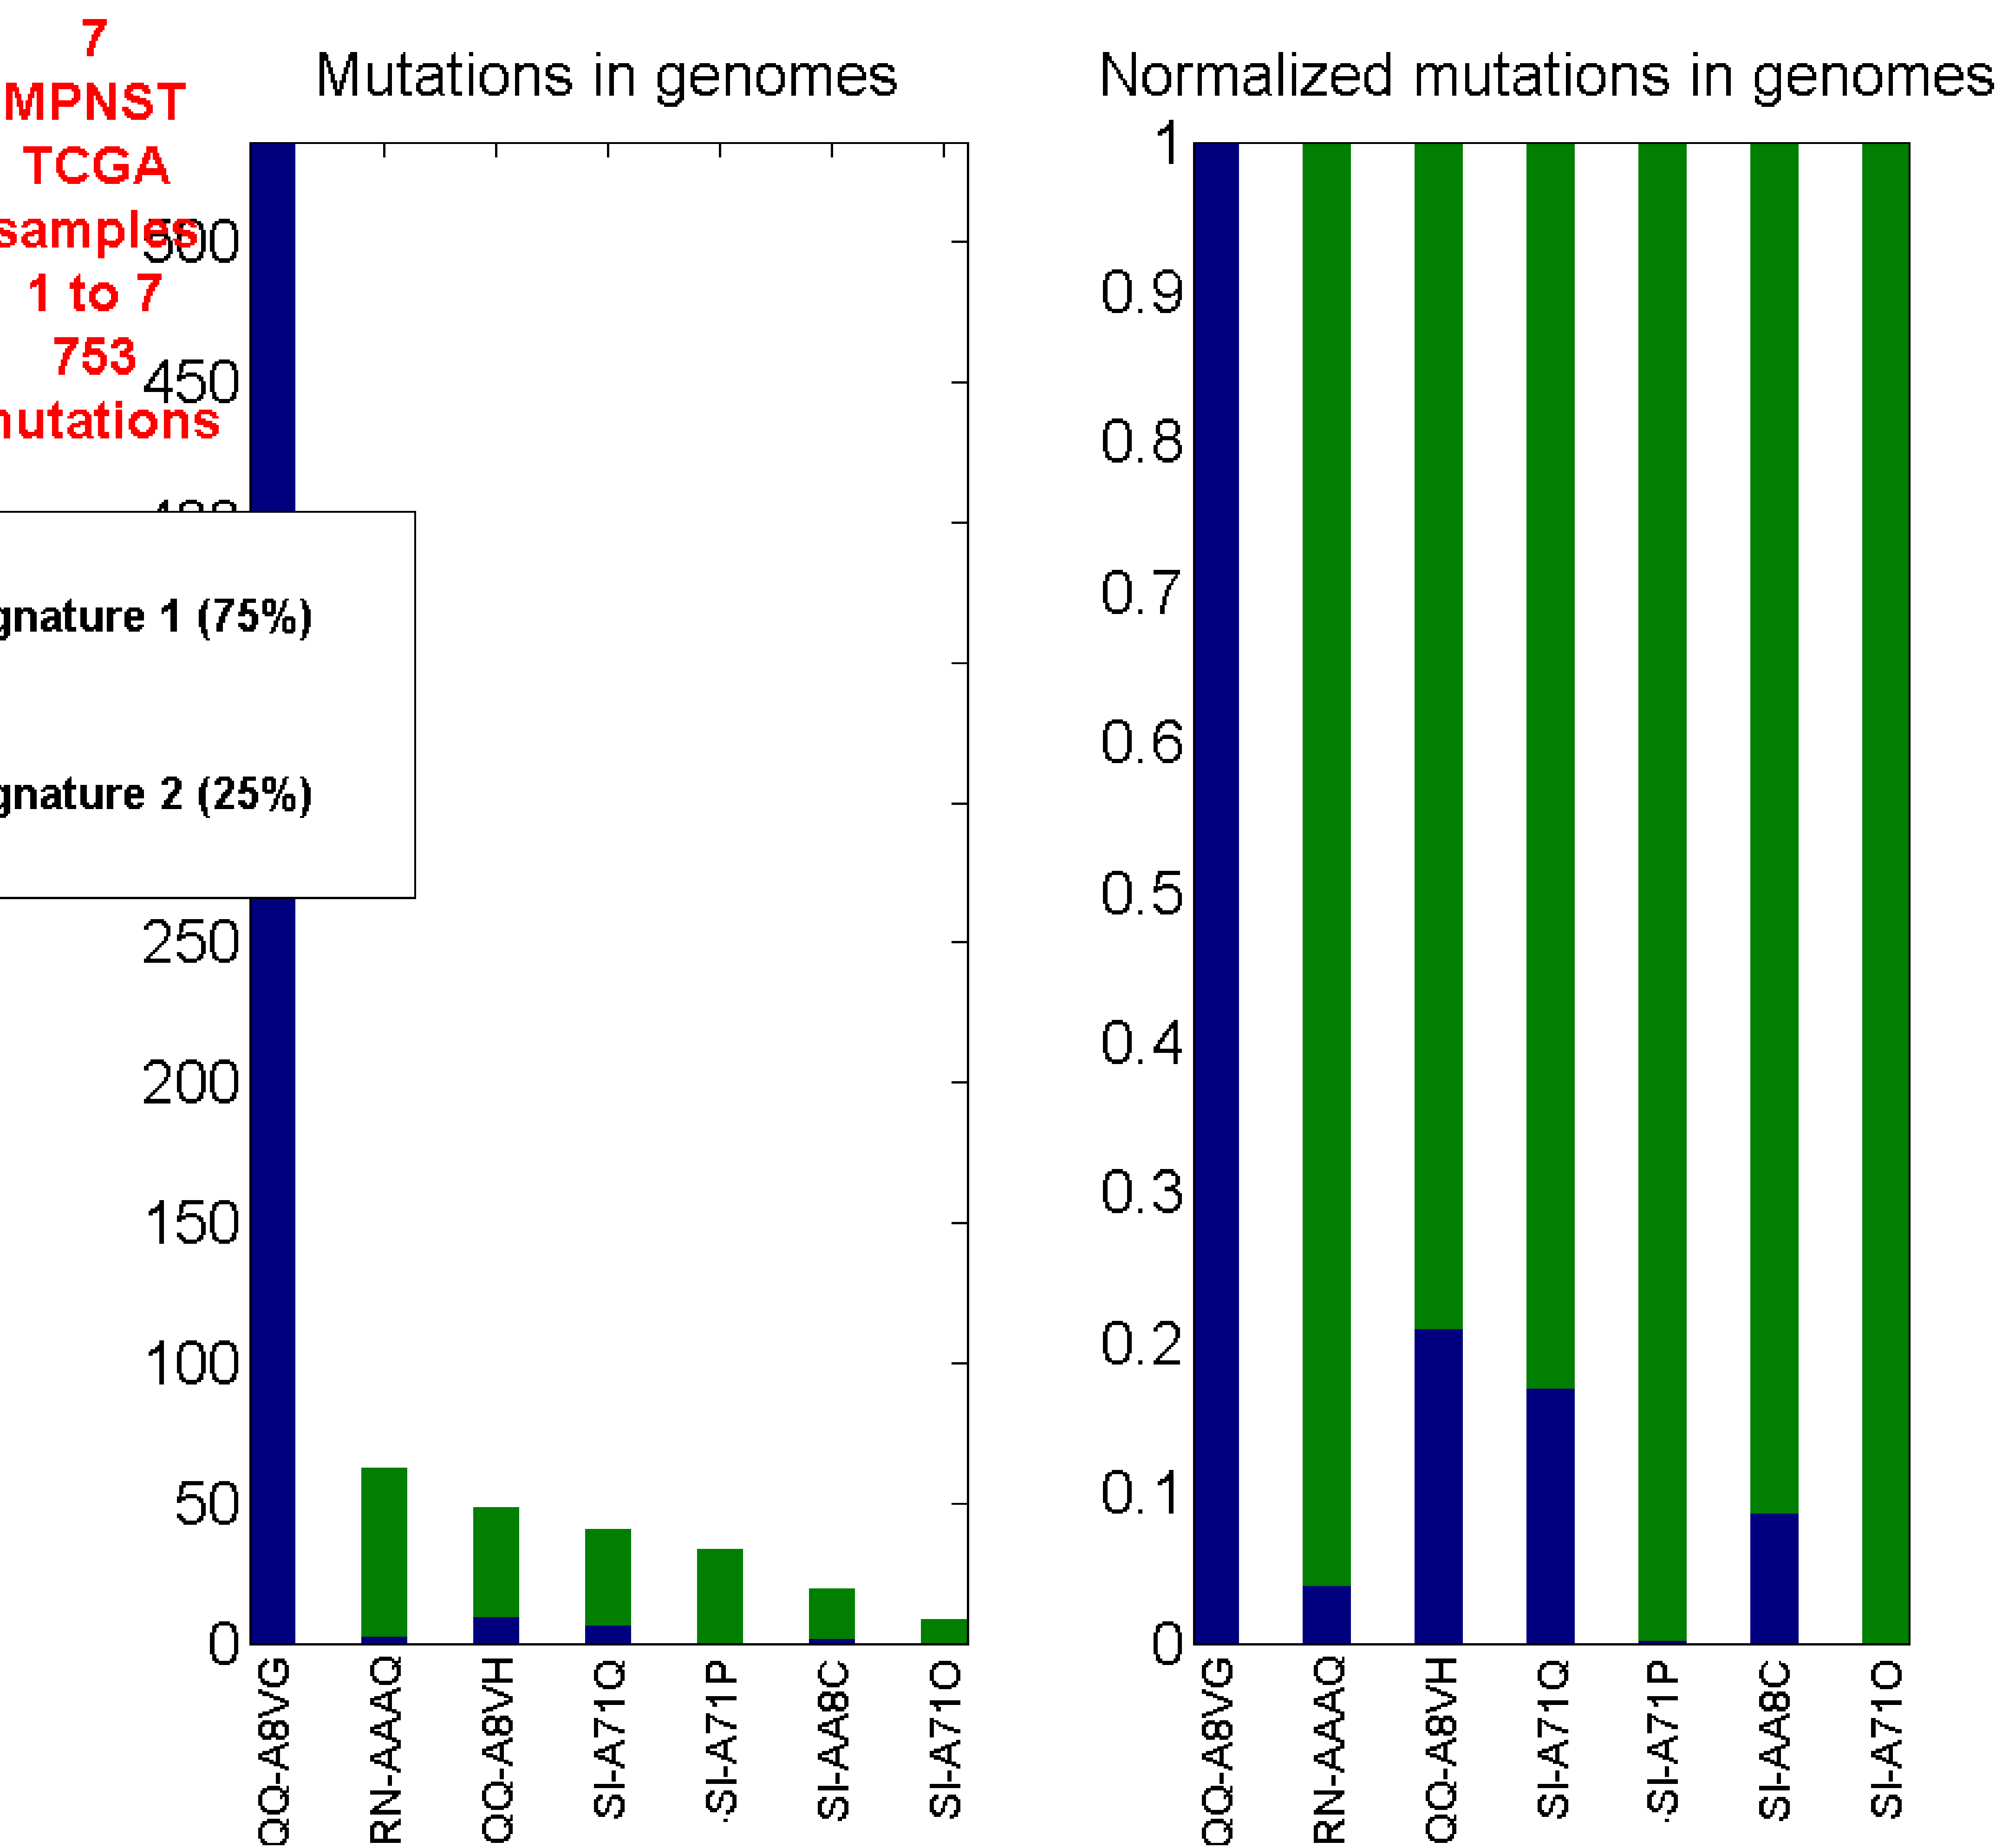

Figure S3: percent of bases with  $\geq 10X$  coverage in key genes

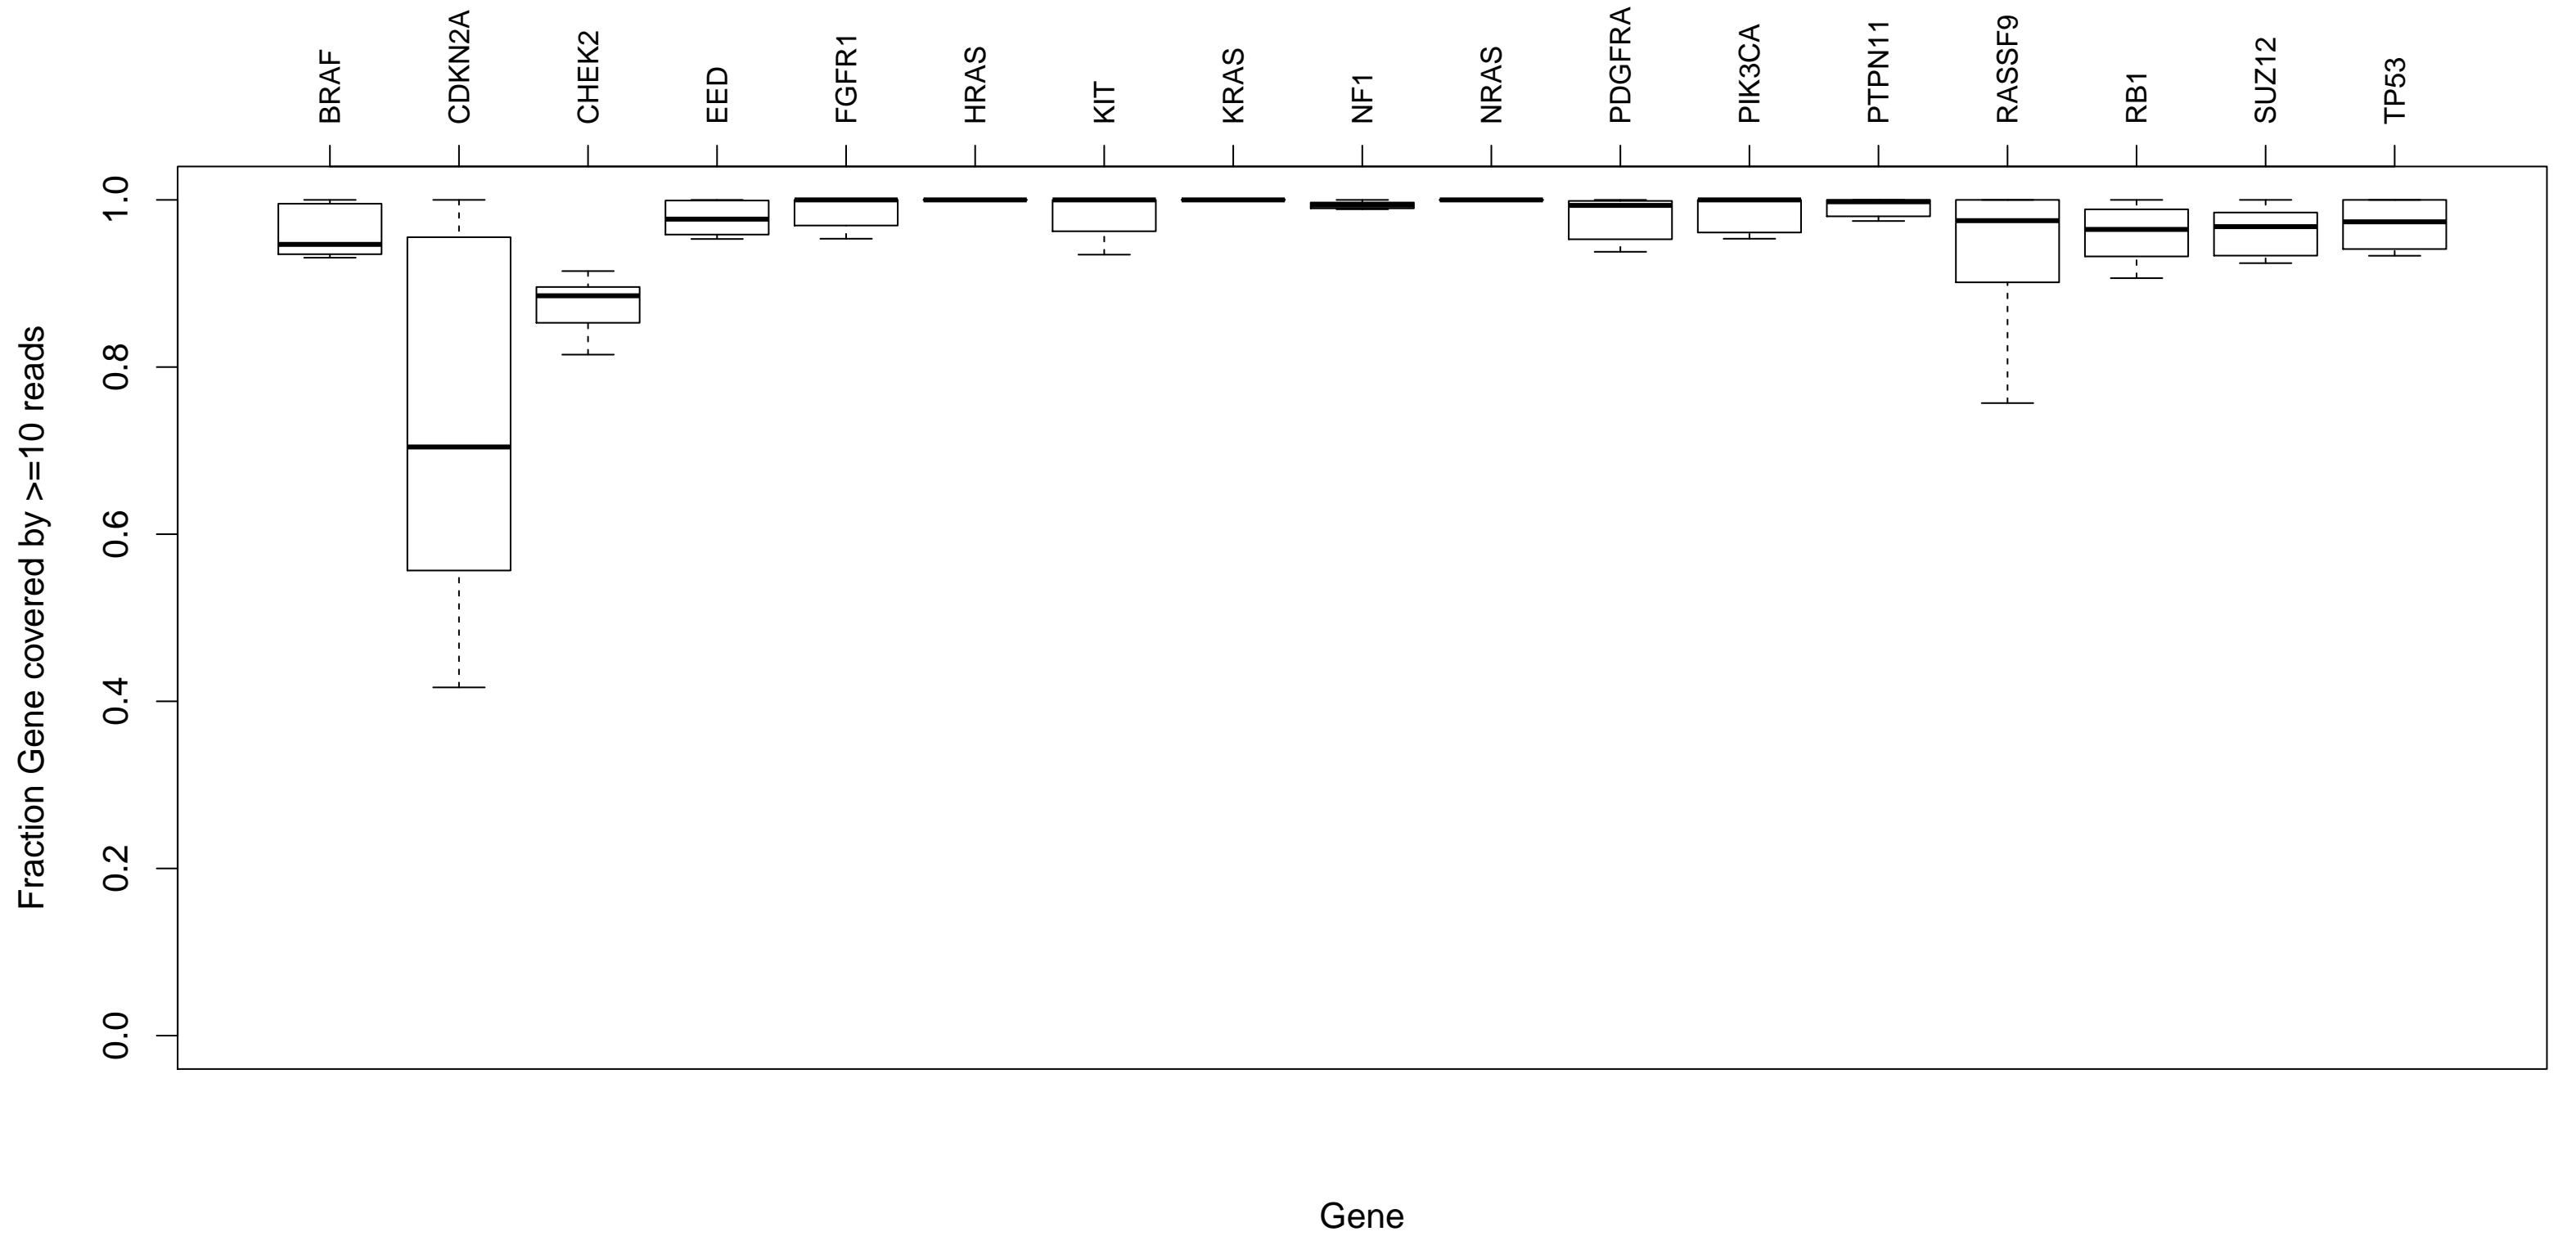

Table S1: Somatic coding variants from in-house samples

| Sample   | Chromosome | Start_Position | End_Position | Variant_Classification | Variant_Type | Reference_Alts | Tumor_Seq_Allele1 | Tumor_Seq_Allele2 | Tumor_Breads | Sequence_Joins | Sequence | Annotation_Transcript | Transcript_Start | CDS_Change | Protein_Change | Sequencing_Depth | Alt_Allele_Frequency |
|----------|------------|----------------|--------------|------------------------|--------------|----------------|-------------------|-------------------|--------------|----------------|----------|-----------------------|------------------|------------|----------------|------------------|----------------------|
| SPG17    | 1          | 11803001       | 11803001     | nonstopgain            | SNP          | T              |                   | C                 | patient_1_1  | WGS            | Illuina  | NM_020996             | exon14           | c.45ASG    | p.R162AG       | 81               | 0.4815               |
| FCP1     | 1          | 12093000       | 12093000     | nonstopgain            | SNP          | G              | A                 | A                 | patient_1_1  | WGS            | Illuina  | NM_02107360           | exon1            | c.4351T    | p.Y176L        | 102              | 0.2022               |
| NBP10    | 1          | 14512655       | 14512655     | nonstopgain            | SNP          | A              | G                 | A                 | patient_1_1  | WGS            | Illuina  | NM_02109303           | exon7            | c.4551T    | p.R151L        | 217              | 0.0504               |
| NBP10    | 1          | 14512666       | 14512666     | nonstopgain            | SNP          | A              | G                 | A                 | patient_1_1  | WGS            | Illuina  | NM_02109303           | exon7            | c.4551G    | p.R151L        | 529              | 0.0737               |
| ANKK1    | 1          | 15610077       | 15610077     | nonstopgain            | SNP          | A              | G                 | A                 | patient_1_1  | WGS            | Illuina  | NM_02107070           | exon9            | c.4021T    | p.R133L        | 203              | 0.3044               |
| ANKK1    | 1          | 6974588        | 6974588      | nonstopgain            | SNP          | T              | G                 | G                 | patient_1_1  | WGS            | Illuina  | NM_049111             | exon5            | c.4213G    | p.W707A        | 267              | 0.2076               |
| ZRANK1   | 1          | 11603705       | 11603705     | stopgain               | SNP          | T              | G                 | G                 | patient_1_1  | WGS            | Illuina  | NM_02109303           | exon7            | c.4545T    | p.R151L        | 207              | 0.0475               |
| HPO1     | 1          | 13814505       | 13814505     | nonstopgain            | SNP          | C              | T                 | T                 | patient_1_1  | WGS            | Illuina  | NM_021156             | exon2            | c.4017A    | p.G546E        | 137              | 0.0457               |
| HLA-DQA1 | 1          | 13814505       | 13814505     | nonstopgain            | SNP          | C              | T                 | T                 | patient_1_1  | WGS            | Illuina  | NM_021156             | exon2            | c.4017A    | p.G546E        | 73               | 0.1844               |
| POAO     | 1          | 12281818       | 12281818     | nonstopgain            | SNP          | G              | C                 | C                 | patient_1_1  | WGS            | Illuina  | NM_050810             | exon16           | c.6131AC   | p.D454H        | 506              | 0.2075               |
| ADP1     | 1          | 14310176       | 14310176     | nonstopgain            | SNP          | G              | A                 | A                 | patient_1_1  | WGS            | Illuina  | NM_021242             | exon6            | c.61077A   | p.G339S        | 126              | 0.2222               |
| H        | 1          | 16479229       | 16479229     | nonstopgain            | SNP          | T              | G                 | G                 | patient_1_1  | WGS            | Illuina  | NM_021242             | exon6            | c.7246AC   | p.R244L        | 103              | 0.0616               |
| ICE2     | 1          | 18397379       | 18397379     | stopgain               | SNP          | A              | G                 | G                 | patient_1_1  | WGS            | Illuina  | NM_048493             | exon2            | c.1031A    | p.P165F        | 78               | 0.5585               |
| ACT3B    | 1          | 44447878       | 44447878     | nonstopgain            | SNP          | C              | T                 | T                 | patient_1_1  | WGS            | Illuina  | NM_088113             | exon4            | c.4072A    | p.R133L        | 108              | 0.058                |
| LAMTOR1  | 1          | 30801020       | 30801020     | stopgain               | SNP          | T              | G                 | G                 | patient_1_1  | WGS            | Illuina  | NM_021290             | exon7            | c.4306G    | p.L162L        | 95               | 0.5503               |
| HLA-DQA1 | 1          | 30801020       | 30801020     | stopgain               | SNP          | T              | G                 | G                 | patient_1_1  | WGS            | Illuina  | NM_021290             | exon7            | c.4306G    | p.L162L        | 10               | 0.4239               |
| SDHA     | 1          | 238696         | 238696       | nonstopgain            | SNP          | G              | A                 | A                 | patient_1_1  | WGS            | Illuina  | NM_041488             | exon30           | c.6214AA   | p.E472E        | 211              | 0.0616               |
| SDHA     | 1          | 238696         | 238696       | nonstopgain            | SNP          | G              | A                 | A                 | patient_1_1  | WGS            | Illuina  | NM_041488             | exon30           | c.6214AA   | p.E472E        | 268              | 0.0616               |
| PERF8    | 1          | 13642978       | 13642978     | nonstopgain            | SNP          | G              | C                 | C                 | patient_1_1  | WGS            | Illuina  | NM_021845             | exon1            | c.629C     | p.R131P        | 192              | 0.2004               |
| NM2303   | 1          | 10021340       | 10021340     | nonstopgain            | SNP          | G              | A                 | A                 | patient_1_1  | WGS            | Illuina  | NM_021846             | exon1            | c.6292A    | p.G288R        | 168              | 0.4288               |
| NET      | 1          | 11642538       | 11642538     | nonstopgain            | SNP          | T              | C                 | C                 | patient_1_1  | WGS            | Illuina  | NM_02127200           | exon1            | c.7128AC   | p.T309T        | 267              | 0.4607               |
| SM       | 1          | 15506440       | 15506440     | nonstopgain            | SNP          | G              | C                 | C                 | patient_1_1  | WGS            | Illuina  | NM_020191             | exon1            | c.4377G    | p.S538L        | 210              | 0.2143               |
| AT7B282  | 1          | 20025009       | 20025009     | nonstopgain            | SNP          | G              | C                 | C                 | patient_1_1  | WGS            | Illuina  | NM_020191             | exon1            | c.6505C    | p.R155L        | 105              | 0.4                  |
| TEX1     | 1          | 3064400        | 3064400      | nonstopgain            | SNP          | C              | G                 | G                 | patient_1_1  | WGS            | Illuina  | NM_021127             | exon1            | c.62821C   | p.R271P        | 88               | 0.3636               |
| TEX1     | 1          | 3064400        | 3064400      | nonstopgain            | SNP          | C              | G                 | G                 | patient_1_1  | WGS            | Illuina  | NM_021127             | exon1            | c.62821C   | p.R271P        | 109              | 0.3636               |
| HMS2     | 1          | 65026745       | 65026745     | nonstopgain            | SNP          | G              | A                 | A                 | patient_1_1  | WGS            | Illuina  | NM_01100317           | exon19           | c.6123AA   | p.R3279H       | 319              | 0.2124               |
| PRKCI1   | 1          | 11041270       | 11041270     | nonstopgain            | SNP          | G              | A                 | A                 | patient_1_1  | WGS            | Illuina  | NM_021751             | exon12           | c.6399AA   | p.G331E        | 299              | 0.448                |
| PRKCI1   | 1          | 11041270       | 11041270     | nonstopgain            | SNP          | G              | A                 | A                 | patient_1_1  | WGS            | Illuina  | NM_021751             | exon12           | c.6399AA   | p.G331E        | 119              | 0.0604               |
| MUC3B    | 1          | 1362105        | 1362105      | nonstopgain            | SNP          | C              | A                 | A                 | patient_1_1  | WGS            | Illuina  | NM_020456             | exon1            | c.4555A    | p.T520N        | 84               | 0.1786               |
| PRKCI1   | 1          | 1114887        | 1114887      | nonstopgain            | SNP          | C              | T                 | T                 | patient_1_1  | WGS            | Illuina  | NM_020996             | exon7            | c.6131AC   | p.R151L        | 93               | 0.828                |
| CDGA4    | 1          | 626320         | 626320       | nonstopgain            | SNP          | C              | T                 | T                 | patient_1_1  | WGS            | Illuina  | NM_02037329           | exon6            | c.6124T    | p.R413I        | 110              | 0.818                |
| CDY1     | 1          | 5616818        | 5616818      | nonstopgain            | SNP          | C              | T                 | T                 | patient_1_1  | WGS            | Illuina  | NM_01004165           | exon1            | c.6124T    | p.R413I        | 110              | 0.818                |
| MAB11    | 1          | 6171215        | 6171215      | nonstopgain            | SNP          | G              | A                 | A                 | patient_1_1  | WGS            | Illuina  | NM_011405             | exon7            | c.620T     | p.R240R        | 69               | 0.0725               |
| SLC24A5  | 1          | 6171215        | 6171215      | nonstopgain            | SNP          | G              | A                 | A                 | patient_1_1  | WGS            | Illuina  | NM_011405             | exon7            | c.620T     | p.R240R        | 69               | 0.0725               |
| RAGAP1   | 1          | 5018793        | 5018793      | nonstopgain            | SNP          | G              | A                 | A                 | patient_1_1  | WGS            | Illuina  | NM_01126204           | exon15           | c.6132T    | p.P585R        | 87               | 0.0909               |
| RAGAP1   | 1          | 5018844        | 5018844      | nonstopgain            | SNP          | C              | A                 | A                 | patient_1_1  | WGS            | Illuina  | NM_01126204           | exon15           | c.6181AA   | p.A641T        | 89               | 0.0674               |
| RAGAP1   | 1          | 5018844        | 5018844      | nonstopgain            | SNP          | C              | A                 | A                 | patient_1_1  | WGS            | Illuina  | NM_01126204           | exon15           | c.6181AA   | p.A641T        | 89               | 0.0674               |
| RAGAP1   | 1          | 5018844        | 5018844      | nonstopgain            | SNP          | C              | A                 | A                 | patient_1_1  | WGS            | Illuina  | NM_01126204           | exon15           | c.6181AA   | p.A641T        | 89               | 0.0674               |
| RAGAP1   | 1          | 5018844        | 5018844      | nonstopgain            | SNP          | C              | A                 | A                 | patient_1_1  | WGS            | Illuina  | NM_01126204           | exon15           | c.6181AA   | p.A641T        | 89               | 0.0674               |
| RAGAP1   | 1          | 5018844        | 5018844      | nonstopgain            | SNP          | C              | A                 | A                 | patient_1_1  | WGS            | Illuina  | NM_01126204           | exon15           | c.6181AA   | p.A641T        | 89               | 0.0674               |
| RAGAP1   | 1          | 5018844        | 5018844      | nonstopgain            | SNP          | C              | A                 | A                 | patient_1_1  | WGS            | Illuina  | NM_01126204           | exon15           | c.6181AA   | p.A641T        | 89               | 0.0674               |
| RAGAP1   | 1          | 5018844        | 5018844      | nonstopgain            | SNP          | C              | A                 | A                 | patient_1_1  | WGS            | Illuina  | NM_01126204           | exon15           | c.6181AA   | p.A641T        | 89               | 0.0674               |
| RAGAP1   | 1          | 5018844        | 5018844      | nonstopgain            | SNP          | C              | A                 | A                 | patient_1_1  | WGS            | Illuina  | NM_01126204           | exon15           | c.6181AA   | p.A641T        | 89               | 0.0674               |
| RAGAP1   | 1          | 5018844        | 5018844      | nonstopgain            | SNP          | C              | A                 | A                 | patient_1_1  | WGS            | Illuina  | NM_01126204           | exon15           | c.6181AA   | p.A641T        | 89               | 0.0674               |
| RAGAP1   | 1          | 5018844        | 5018844      | nonstopgain            | SNP          | C              | A                 | A                 | patient_1_1  | WGS            | Illuina  | NM_01126204           | exon15           | c.6181AA   | p.A641T        | 89               | 0.0674               |
| RAGAP1   | 1          | 5018844        | 5018844      | nonstopgain            | SNP          | C              | A                 | A                 | patient_1_1  | WGS            | Illuina  | NM_01126204           | exon15           | c.6181AA   | p.A641T        | 89               | 0.0674               |
| RAGAP1   | 1          | 5018844        | 5018844      | nonstopgain            | SNP          | C              | A                 | A                 | patient_1_1  | WGS            | Illuina  | NM_01126204           | exon15           | c.6181AA   | p.A641T        | 89               | 0.0674               |
| RAGAP1   | 1          | 5018844        | 5018844      | nonstopgain            | SNP          | C              | A                 | A                 | patient_1_1  | WGS            | Illuina  | NM_01126204           | exon15           | c.6181AA   | p.A641T        | 89               | 0.0674               |
| RAGAP1   | 1          | 5018844        | 5018844      | nonstopgain            | SNP          | C              | A                 | A                 | patient_1_1  | WGS            | Illuina  | NM_01126204           | exon15           | c.6181AA   | p.A641T        | 89               | 0.0674               |
| RAGAP1   | 1          | 5018844        | 5018844      | nonstopgain            | SNP          | C              | A                 | A                 | patient_1_1  | WGS            | Illuina  | NM_01126204           | exon15           | c.6181AA   | p.A641T        | 89               | 0.0674               |
| RAGAP1   | 1          | 5018844        | 5018844      | nonstopgain            | SNP          | C              | A                 | A                 | patient_1_1  | WGS            | Illuina  | NM_01126204           | exon15           | c.6181AA   | p.A641T        | 89               | 0.0674               |
| RAGAP1   | 1          | 5018844        | 5018844      | nonstopgain            | SNP          | C              | A                 | A                 | patient_1_1  | WGS            | Illuina  | NM_01126204           | exon15           | c.6181AA   | p.A641T        | 89               | 0.0674               |
| RAGAP1   | 1          | 5018844        | 5018844      | nonstopgain            | SNP          | C              | A                 | A                 | patient_1_1  | WGS            | Illuina  | NM_01126204           | exon15           | c.6181AA   | p.A641T        | 89               | 0.0674               |
| RAGAP1   | 1          | 5018844        | 5018844      | nonstopgain            | SNP          | C              | A                 | A                 | patient_1_1  | WGS            | Illuina  | NM_01126204           | exon15           | c.6181AA   | p.A641T        | 89               | 0.0674               |
| RAGAP1   | 1          | 5018844        | 5018844      | nonstopgain            | SNP          | C              | A                 | A                 | patient_1_1  | WGS            | Illuina  | NM_01126204           | exon15           | c.6181AA   | p.A641T        | 89               | 0.0674               |
| RAGAP1   | 1          | 5018844        | 5018844      | nonstopgain            | SNP          | C              | A                 | A                 | patient_1_1  | WGS            | Illuina  | NM_01126204           | exon15           | c.6181AA   | p.A641T        | 89               | 0.0674               |
| RAGAP1   | 1          | 5018844        | 5018844      | nonstopgain            | SNP          | C              | A                 | A                 | patient_1_1  | WGS            | Illuina  | NM_01126204           | exon15           | c.6181AA   | p.A641T        | 89               | 0.0674               |
| RAGAP1   | 1          | 5018844        | 5018844      | nonstopgain            | SNP          | C              | A                 | A                 | patient_1_1  | WGS            | Illuina  | NM_01126204           | exon15           | c.6181AA   | p.A641T        | 89               | 0.0674               |
| RAGAP1   | 1          | 5018844        | 5018844      | nonstopgain            | SNP          | C              | A                 | A                 | patient_1_1  | WGS            | Illuina  | NM_01126204           | exon15           | c.6181AA   | p.A641T        | 89               | 0.0674               |
| RAGAP1   | 1          | 5018844        | 5018844      | nonstopgain            | SNP          | C              | A                 | A                 | patient_1_1  | WGS            | Illuina  | NM_01126204           | exon15           | c.6181AA   | p.A641T        | 89               | 0.0674               |
| RAGAP1   | 1          | 5018844        | 5018844      | nonstopgain            | SNP          | C              | A                 | A                 | patient_1_1  | WGS            | Illuina  | NM_01126204           | exon15           | c.6181AA   | p.A641T        | 89               | 0.0674               |
| RAGAP1   | 1          | 5018844        | 5018844      | nonstopgain            | SNP          | C              | A                 | A                 | patient_1_1  | WGS            | Illuina  | NM_01126204           | exon15           | c.6181AA   | p.A641T        | 89               | 0.0674               |
| RAGAP1   | 1          | 5018844        | 5018844      | nonstopgain            | SNP          | C              | A                 | A                 | patient_1_1  | WGS            | Illuina  | NM_01126204           | exon15           | c.6181AA   | p.A641T        | 89               | 0.0674               |
| RAGAP1   | 1          | 5018844        | 5018844      | nonstopgain            | SNP          | C              | A                 | A                 | patient_1_1  | WGS            | Illuina  | NM_01126204           | exon15           | c.6181AA   | p.A641T        | 89               | 0.0674               |
| RAGAP1   | 1          | 5018844        | 5018844      | nonstopgain            | SNP          | C              | A                 | A                 | patient_1_1  | WGS            | Illuina  | NM_01126204           | exon15           | c.6181AA   | p.A641T        | 89               | 0.0674               |
| RAGAP1   | 1          | 5018844        | 5018844      | nonstopgain            | SNP          | C              | A                 | A                 | patient_1_1  | WGS            | Illuina  | NM_01126204           | exon15           | c.6181AA   | p.A641T        | 89               | 0.0674               |
| RAGAP1   | 1          | 5018844        | 5018844      | nonstopgain            | SNP          | C              | A                 | A                 | patient_1_1  | WGS            | Illuina  | NM_01126204           | exon15           | c.6181AA   | p.A641T        | 89               | 0.0674               |
| RAGAP1   | 1</        |                |              |                        |              |                |                   |                   |              |                |          |                       |                  |            |                |                  |                      |



|          |        |    |          |          |                  |     |   |   |   |           |     |          |              |        |           |          |      |        |
|----------|--------|----|----------|----------|------------------|-----|---|---|---|-----------|-----|----------|--------------|--------|-----------|----------|------|--------|
| NR02     | ha3705 | 20 | 331899   | 331899   | nonredundant_SNV | SNP | G | G | A | patient 3 | WGS | Illumina | NM_024958    | exon4  | c.2235A   | p.A377   | 106  | 0.066  |
| NR03     | ha3705 | 20 | 332099   | 332099   | nonredundant_SNV | SNP | G | G | A | patient 3 | WGS | Illumina | NM_024958    | exon4  | c.2239A   | p.A379   | 81   | 0.073  |
| NR04     | ha3705 | 20 | 2136760  | 2136760  | nonredundant_SNV | SNP | C | C | A | patient 3 | WGS | Illumina | NM_022055    | exon29 | c.2724AA  | p.P955A  | 63   | 0.0794 |
| ACTR5    | ha3705 | 20 | 3737205  | 3737205  | nonredundant_SNV | SNP | G | G | A | patient 3 | WGS | Illumina | NM_022055    | exon29 | c.2733AA  | p.G450   | 30   | 0.1389 |
| COX4     | ha3705 | 21 | 6026911  | 6026911  | nonredundant_SNV | SNP | G | G | A | patient 3 | WGS | Illumina | NM_021794    | exon13 | c.1205AA  | p.G405A  | 67   | 0.07   |
| LAMAY    | ha3705 | 20 | 6082554  | 6082554  | splitting        | SNP | T | C | C | patient 3 | WGS | Illumina | 0            | 0      | 0         | 0        | 55   | 0.1061 |
| KCNK2    | ha3705 | 20 | 6201505  | 6201505  | nonredundant_SNV | SNP | G | G | A | patient 3 | WGS | Illumina | NM_022077    | exon15 | c.1511TT  | p.P545L  | 47   | 0.0636 |
| MCR1     | ha3705 | 21 | 3774320  | 3774320  | nonredundant_SNV | SNP | G | G | A | patient 3 | WGS | Illumina | NM_00114602  | exon15 | c.12913A  | p.V303I  | 123  | 0.065  |
| KCNK4    | ha3705 | 21 | 3781970  | 3781970  | nonredundant_SNV | SNP | G | G | A | patient 3 | WGS | Illumina | NM_00114602  | exon15 | c.12927T  | p.V307I  | 104  | 0.0714 |
| ANG1     | ha3705 | 21 | 4364912  | 4364912  | nonredundant_SNV | SNP | G | G | A | patient 3 | WGS | Illumina | NM_004915    | exon2  | c.101AA   | p.R30A   | 123  | 0.0488 |
| CSGAL1   | ha3705 | 21 | 4364918  | 4364918  | nonredundant_SNV | SNP | G | G | A | patient 3 | WGS | Illumina | NM_004915    | exon2  | c.101AA   | p.R30A   | 107  | 0.0487 |
| MMP1     | ha3705 | 22 | 2045608  | 2045608  | nonredundant_SNV | SNP | C | C | G | patient 3 | WGS | Illumina | NM_015617    | exon1  | c.1464AA  | p.L464G  | 12   | 0.0667 |
| MMP1     | ha3705 | 22 | 2045708  | 2045708  | nonredundant_SNV | SNP | C | C | G | patient 3 | WGS | Illumina | NM_015617    | exon1  | c.1464AA  | p.L464G  | 115  | 0.0261 |
| MMP1     | ha3705 | 22 | 2045824  | 2045824  | nonredundant_SNV | SNP | C | C | G | patient 3 | WGS | Illumina | NM_015617    | exon1  | c.1462TT  | p.R462A  | 102  | 0.1313 |
| ICR      | ha3705 | 22 | 2361251  | 2361251  | nonredundant_SNV | SNP | G | G | A | patient 3 | WGS | Illumina | NM_045927    | exon1  | c.1027TT  | p.R303A  | 124  | 0.1375 |
| GAB1     | ha3705 | 22 | 2454307  | 2454307  | nonredundant_SNV | SNP | G | G | A | patient 3 | WGS | Illumina | NM_045927    | exon1  | c.1044TT  | p.R312A  | 124  | 0.0792 |
| CH22     | ha3705 | 22 | 2901340  | 2901340  | nonredundant_SNV | SNP | T | C | C | patient 3 | WGS | Illumina | NM_01001395  | exon12 | c.1214AG  | p.R416E  | 129  | 0.0465 |
| RS26     | ha3705 | 22 | 3852429  | 3852429  | nonredundant_SNV | SNP | C | C | A | patient 3 | WGS | Illumina | NM_001064    | exon1  | c.1318TT  | p.R466A  | 129  | 0.0465 |
| CRK3     | ha3705 | X  | 1860039  | 1860039  | nonredundant_SNV | SNP | C | C | A | patient 3 | WGS | Illumina | NM_001319    | exon2  | c.1632AA  | p.S164R  | 138  | 0.0507 |
| DN2      | ha3705 | X  | 3124504  | 3124504  | nonredundant_SNV | SNP | C | C | A | patient 3 | WGS | Illumina | NM_000608    | exon1  | c.1305AA  | p.L305A  | 84   | 0.0405 |
| FRS1     | ha3705 | X  | 3713579  | 3713579  | nonredundant_SNV | SNP | C | C | G | patient 3 | WGS | Illumina | NM_01142395  | exon4  | c.C82G    | p.P121H  | 113  | 0.0708 |
| SEC2C    | ha3705 | X  | 5328394  | 5328394  | nonredundant_SNV | SNP | G | G | A | patient 3 | WGS | Illumina | NM_0111225   | exon4  | c.1318TT  | p.S450F  | 65   | 0.0277 |
| LBR1     | ha3705 | X  | 7021726  | 7021726  | nonredundant_SNV | SNP | C | C | A | patient 3 | WGS | Illumina | NM_002020    | exon4  | c.1202AA  | p.P402R  | 66   | 0.0662 |
| PHAL     | ha3705 | X  | 7386821  | 7386821  | splitting        | SNP | C | C | T | patient 3 | WGS | Illumina | 0            | 0      | 0         | 0        | 102  | 0.0686 |
| STYX4    | ha3705 | X  | 7728006  | 7728006  | nonredundant_SNV | SNP | G | G | A | patient 3 | WGS | Illumina | NM_000002    | exon16 | c.1618AA  | p.V540A  | 120  | 0.0212 |
| AMOT     | ha3705 | X  | 11202429 | 11202429 | nonredundant_SNV | SNP | C | C | G | patient 3 | WGS | Illumina | NM_00113490  | exon9  | c.1222CC  | p.R760H  | 46   | 0.087  |
| SGP1     | ha3705 | X  | 12067826 | 12067826 | nonredundant_SNV | SNP | G | G | A | patient 3 | WGS | Illumina | NM_00117095  | exon10 | c.1296AA  | p.S1230G | 38   | 0.4211 |
| ACAP1    | ha3705 | 1  | 1212103  | 1212103  | nonredundant_SNV | SNP | G | G | A | patient 4 | WGS | Illumina | NM_000449    | exon18 | c.1318AT  | p.R540W  | 44   | 0.1136 |
| PMAF1    | ha3705 | 1  | 1281578  | 1281578  | splitting        | SNP | A | A | A | patient 4 | WGS | Illumina | NM_001201    | exon4  | c.A555T   | p.R44K   | 64   | 0.0735 |
| PMAF4    | ha3705 | 1  | 1291955  | 1291955  | nonredundant_SNV | SNP | C | C | A | patient 4 | WGS | Illumina | NM_001091    | exon4  | c.1116TA  | p.R48A   | 118  | 0.0701 |
| STGALAC1 | ha3705 | 1  | 1677764  | 1677764  | nonredundant_SNV | SNP | C | C | T | patient 4 | WGS | Illumina | NM_002099    | exon2  | c.176C    | p.V51A   | 142  | 0.2234 |
| GMP      | ha3705 | 1  | 1895903  | 1895903  | splitting        | SNP | A | A | G | patient 4 | WGS | Illumina | NM_01009613  | exon1  | c.1021TA  | p.S425   | 196  | 0.0918 |
| STGALAC1 | ha3705 | 1  | 18176763 | 18176763 | nonredundant_SNV | SNP | G | G | A | patient 4 | WGS | Illumina | NM_001133068 | exon1  | c.1222AA  | p.R397G  | 271  | 0.0643 |
| MHP10    | ha3705 | 1  | 18159449 | 18159449 | nonredundant_SNV | SNP | G | G | A | patient 4 | WGS | Illumina | NM_00139703  | exon1  | c.156AC   | p.E232   | 1656 | 0.0187 |
| MHP10    | ha3705 | 1  | 18159450 | 18159450 | nonredundant_SNV | SNP | G | G | A | patient 4 | WGS | Illumina | NM_00139703  | exon1  | c.156AC   | p.E232   | 1656 | 0.0187 |
| MHP10    | ha3705 | 1  | 18158664 | 18158664 | duplication_SNV  | SNP | G | G | T | patient 4 | WGS | Illumina | NM_00139703  | exon4  | c.1035A2T | p.G154R  | 709  | 0.0296 |
| MHP14    | ha3705 | 1  | 14800910 | 14800910 | splitting        | SNP | G | G | A | patient 4 | WGS | Illumina | NM_001588    | exon6  | c.1379TT  | p.S399Y  | 343  | 0.0091 |
| HMN1     | ha3705 | 1  | 1521878  | 1521878  | nonredundant_SNV | SNP | G | G | A | patient 4 | WGS | Illumina | NM_002099    | exon1  | c.1051AA  | p.R351W  | 272  | 0.0722 |
| NOF2     | ha3705 | 1  | 16112245 | 16112245 | nonredundant_SNV | SNP | G | G | A | patient 4 | WGS | Illumina | NM_004505    | exon2  | c.107CC   | p.Y30L   | 167  | 0.1719 |
| DTN2     | ha3705 | 1  | 20024142 | 20024142 | nonredundant_SNV | SNP | G | G | A | patient 4 | WGS | Illumina | NM_000701    | exon2  | c.1227TA  | p.R382A  | 104  | 0.071  |
| CR7      | ha3705 | 1  | 20778751 | 20778751 | duplication_SNV  | SNP | C | C | A | patient 4 | WGS | Illumina | NM_000651    | exon1  | c.1580AT  | p.R324K  | 804  | 0.0691 |
| TRAF3IP3 | ha3705 | 1  | 2098471  | 2098471  | nonredundant_SNV | SNP | G | G | A | patient 4 | WGS | Illumina | NM_001201    | exon4  | c.1781CT  | p.R437T  | 84   | 0.0717 |
| CRS4     | ha3705 | 1  | 3941480  | 3941480  | splitting        | SNP | G | G | A | patient 4 | WGS | Illumina | NM_00109045  | exon6  | c.1702T   | p.F214F  | 151  | 0.2514 |
| SIB      | ha3705 | 1  | 4121504  | 4121504  | nonredundant_SNV | SNP | C | C | A | patient 4 | WGS | Illumina | NM_000608    | exon1  | c.1612AT  | p.R312H  | 113  | 0.071  |
| FRS2     | ha3705 | 2  | 24062243 | 24062243 | nonredundant_SNV | SNP | G | G | A | patient 4 | WGS | Illumina | NM_00108035  | exon1  | c.1317T   | p.R15W   | 150  | 0.0687 |
| SH3AC1   | ha3705 | 2  | 4777039  | 4777039  | nonredundant_SNV | SNP | G | G | A | patient 4 | WGS | Illumina | NM_002078    | exon6  | c.1022A   | p.P202H  | 146  | 0.2003 |
| SH3AC2   | ha3705 | 2  | 4786146  | 4786146  | nonredundant_SNV | SNP | G | G | A | patient 4 | WGS | Illumina | NM_002078    | exon1  | c.1211AA  | p.R211A  | 272  | 0.0682 |
| CLTND2   | ha3705 | 3  | 18202145 | 18202145 | nonredundant_SNV | SNP | T | C | C | patient 4 | WGS | Illumina | NM_002111    | exon13 | c.1720CT  | p.R767I  | 105  | 0.2762 |
| MANE     | ha3705 | 3  | 18426193 | 18426193 | nonredundant_SNV | SNP | C | C | A | patient 4 | WGS | Illumina | NM_000002    | exon1  | c.1441G   | p.R441G  | 62   | 0.216  |
| CRPAK    | ha3705 | 4  | 1380107  | 1380107  | nonredundant_SNV | SNP | G | G | A | patient 4 | WGS | Illumina | NM_017918    | exon1  | c.1078AA  | p.R246G  | 87   | 0.1264 |
| DN2      | ha3705 | 4  | 1843917  | 1843917  | nonredundant_SNV | SNP | C | C | A | patient 4 | WGS | Illumina | NM_000608    | exon1  | c.1318TT  | p.R466A  | 87   | 0.0465 |
| UGT3A1   | ha3705 | 4  | 7006424  | 7006424  | nonredundant_SNV | SNP | T | C | C | patient 4 | WGS | Illumina | NM_001073    | exon6  | c.A132AG  | p.R422V  | 430  | 0.0214 |
| AMER1B   | ha3705 | 5  | 1064784  | 1064784  | nonredundant_SNV | SNP | G | G | A | patient 4 | WGS | Illumina | NM_00104480  | exon6  | c.1030AA  | p.R312A  | 126  | 0.0713 |
| DN2      | ha3705 | 5  | 14005007 | 14005007 | nonredundant_SNV | SNP | C | C | A | patient 4 | WGS | Illumina | NM_000608    | exon1  | c.1318AA  | p.R466A  | 112  | 0.0682 |
| DN2      | ha3705 | 5  | 14005026 | 14005026 | splitting        | SNP | G | G | A | patient 4 | WGS | Illumina | NM_0012449   | exon1  | c.1304AT  | p.R338H  | 142  | 0.0775 |
| PCDH13   | ha3705 | 5  | 14008444 | 14008444 | nonredundant_SNV | SNP | C | C | A | patient 4 | WGS | Illumina | NM_000812    | exon4  | c.1474TC  | p.R474G  | 104  | 0.0745 |
| HLA-DMS  | ha3705 | 6  | 1247913  | 1247913  | nonredundant_SNV | SNP | T | T | C | patient 4 | WGS | Illumina | NM_001225    | exon1  | c.108TT   | p.G30V   | 441  | 0.0522 |
| HLA-DMS  | ha3705 | 6  | 1831111  | 1831111  | splitting        | SNP | C | C | G | patient 4 | WGS | Illumina | 0            | 0      | 0         | 0        | 0    | 0.0445 |
| PRF4     | ha3705 | 6  | 14982138 | 14982138 | splitting        | SNP | A | A | A | patient 4 | WGS | Illumina | NM_0129120   | exon3  | c.1768AG  | p.P54P   | 250  | 0.116  |
| ADAM10   | ha3705 | 6  | 1542819  | 1542819  | nonredundant_SNV | SNP | C | C | A | patient 4 | WGS | Illumina | NM_00104480  | exon3  | c.1498TT  | p.R498T  | 263  | 0.2124 |
| SYT11    | ha3705 | 6  | 7564121  | 7564121  | nonredundant_SNV | SNP | T | C | C | patient 4 | WGS | Illumina | NM_000488    | exon5  | c.A932G   | p.Y131C  | 68   | 0.2794 |
| MUC2     | ha3705 | 7  | 10061769 | 10061769 | splitting        | SNP | C | C | A | patient 4 | WGS | Illumina | NM_00116462  | exon2  | c.C995T   | p.S120L  | 115  | 0.3636 |
| MUC2     | ha3705 | 7  | 10061800 | 10061800 | nonredundant_SNV | SNP | C | C | A | patient 4 | WGS | Illumina | NM_00116462  | exon2  | c.C995A   | p.S120L  | 105  | 0.0727 |
| TEC      | ha3705 | 7  | 1155195  | 1155195  | nonredundant_SNV | SNP | G | G | A | patient 4 | WGS | Illumina | NM_002392    | exon7  | c.1055G   | p.T392G  | 185  | 0.4757 |
| TRAF6    | ha3705 | 7  | 1286160  | 1286160  | nonredundant_SNV | SNP | G | G | A | patient 4 | WGS | Illumina | NM_002392    | exon12 | c.1041AA  | p.R342A  | 107  | 0.071  |
| MLL3     | ha3705 | 7  | 15512168 | 15512168 | nonredundant_SNV | SNP | C | C | A | patient 4 | WGS | Illumina | NM_017006    | exon6  | c.1119TT  | p.R302L  | 744  | 0.0403 |
| MMP1     | ha3705 | 7  | 1071725  | 1071725  | nonredundant_SNV | SNP | C | C | A | patient 4 | WGS | Illumina | NM_001090    | exon13 | c.1379TT  | p.R379L  | 410  | 0.071  |
| HALS     | ha3705 | 9  | 1957888  | 1957888  | nonredundant_SNV | SNP | G | G | A | patient 4 | WGS | Illumina | NM_012745    | exon16 | c.1317TG  | p.R262H  | 234  | 0.0556 |
| FAM78A   | ha3705 | 9  | 4324051  | 4324051  | nonredundant_SNV | SNP | C | C | A | patient 4 | WGS | Illumina | NM_00145145  | exon1  | c.101AA   | p.R312H  | 107  | 0.0897 |
| DMBP     | ha3705 | 9  | 12441035 | 12441035 | splitting        | SNP | C | C | T | patient 4 | WGS | Illumina | NM_000608    | exon1  | c.1318TT  | p.R466L  | 74   | 0.1116 |
| NEGR1    | ha3705 | 9  | 12620124 | 12620124 | nonredundant_SNV | SNP | C | C | A | patient 4 | WGS | Illumina | NM_00100068  | exon13 | c.1240AT  | p.S284Y  | 115  | 0.0609 |
| TCR2     | ha3705 | 9  | 13046211 | 13046211 | nonredundant_SNV | SNP | C | C | A | patient 4 | WGS | Illumina | NM_001466    | exon1  | c.A508T   | p.R508T  | 104  | 0.24   |
| TUBB1    | ha3705 | 10 | 99378    | 99378    | splitting        | SNP | C | C | A | patient 4 | WGS | Illumina | NM_017787    | exon1  | c.C34T    | p.D118D  | 170  | 0.171  |
| FRS3A    | ha3705 |    |          |          |                  |     |   |   |   |           |     |          |              |        |           |          |      |        |

|          |        |   |          |          |                    |     |   |   |   |           |     |          |             |        |          |          |     |        |
|----------|--------|---|----------|----------|--------------------|-----|---|---|---|-----------|-----|----------|-------------|--------|----------|----------|-----|--------|
| DDP      | HA3765 | 4 | 8815050  | 8815050  | synonymous_SNP     | SNP | T | T | C | patient 5 | WGS | Illumina | NM_014208   | exon5  | c.17738C | p.S992S  | 167 | 0.0509 |
| DNCC2    | HA3765 | 4 | 8810271  | 8810271  | synonymous_SNP     | SNP | T | T | C | patient 5 | WGS | Illumina | NM_014208   | exon5  | c.16248A | p.T9487T | 167 | 0.2305 |
| ARCE1    | HA3765 | 4 | 14601139 | 14601139 | synonymous_SNP     | SNP | T | T | C | patient 5 | WGS | Illumina | NM_01404876 | exon1  | c.1799C  | p.D338D  | 135 | 0.0815 |
| PT112    | HA3765 | 4 | 12679941 | 12679941 | non synonymous_SNP | DEL | T | T | C | patient 5 | WGS | Illumina | NM_0140564  | exon2  | c.1310D  | p.L310V  | 100 | 0.0488 |
| GDR      | HA3765 | 4 | 11709941 | 11709941 | non synonymous_SNP | SNP | T | T | C | patient 5 | WGS | Illumina | NM_01166600 | exon1  | c.171G   | p.F7V    | 118 | 0.1014 |
| ZORHC11  | HA3765 | 5 | 841742   | 841742   | non synonymous_SNP | SNP | C | C | A | patient 5 | WGS | Illumina | NM_024785   | exon2  | c.10256A | p.R209H  | 61  | 0.1148 |
| CSAR2    | HA3765 | 5 | 3713883  | 3713883  | non synonymous_SNP | SNP | C | C | A | patient 5 | WGS | Illumina | NM_012071   | exon2  | c.4330G  | p.R1330W | 50  | 0.0802 |
| CSAR2    | HA3765 | 5 | 3721316  | 3721316  | non synonymous_SNP | SNP | T | T | C | patient 5 | WGS | Illumina | NM_023071   | exon6  | c.12456G | p.R209H  | 159 | 0.0881 |
| ITP11    | HA3765 | 5 | 7281513  | 7281513  | non synonymous_SNP | SNP | T | T | C | patient 5 | WGS | Illumina | NM_012117   | exon1  | c.1634G  | p.R537V  | 91  | 0.1024 |
| PM046    | HA3765 | 5 | 12215183 | 12215183 | synonymous_SNP     | SNP | C | C | A | patient 5 | WGS | Illumina | NM_01138239 | exon7  | c.15100T | p.G203C  | 93  | 0.1319 |
| PT130    | HA3765 | 5 | 12410413 | 12410413 | non synonymous_SNP | SNP | C | C | A | patient 5 | WGS | Illumina | NM_012118   | exon1  | c.12138A | p.R413G  | 151 | 0.0780 |
| PCDH8    | HA3765 | 5 | 14048133 | 14048133 | synonymous_SNP     | SNP | C | C | A | patient 5 | WGS | Illumina | NM_0158917  | exon7  | c.16180T | p.P540F  | 71  | 0.1028 |
| PCDH8    | HA3765 | 5 | 14050134 | 14050134 | non synonymous_SNP | SNP | C | C | A | patient 5 | WGS | Illumina | NM_018394   | exon1  | c.12314A | p.A232E  | 84  | 0.1111 |
| TCF12    | HA3765 | 5 | 14548613 | 14548613 | non synonymous_SNP | DEL | C | C | A | patient 5 | WGS | Illumina | NM_012072   | exon4  | c.618A   | p.R464H  | 80  | 0.2027 |
| DDA1     | HA3765 | 5 | 17083795 | 17083795 | synonymous_SNP     | SNP | G | G | A | patient 5 | WGS | Illumina | NM_014123   | exon1  | c.1066C  | p.R322T  | 29  | 0.1724 |
| CSAR2    | HA3765 | 5 | 17007930 | 17007930 | synonymous_SNP     | SNP | A | A | G | patient 5 | WGS | Illumina | NM_014123   | exon1  | c.1066C  | p.R322T  | 29  | 0.1724 |
| LOC53423 | HA3765 | 6 | 27914971 | 27914971 | splicing           | SNP | A | A | G | patient 5 | WGS | Illumina |             | 0      | 0        | 0        | 144 | 0.1042 |
| HLA-A    | HA3765 | 6 | 29910301 | 29910301 | synonymous_SNP     | SNP | C | C | A | patient 5 | WGS | Illumina | NM_002136   | exon1  | p.A5A    |          | 88  | 0.2100 |
| HLA-A    | HA3765 | 6 | 29910340 | 29910340 | non synonymous_SNP | SNP | A | A | G | patient 5 | WGS | Illumina | NM_012116   | exon1  | c.1A10G  | p.M39V   | 185 | 0.0599 |
| HLA-A    | HA3765 | 6 | 29910359 | 29910359 | non synonymous_SNP | SNP | C | C | A | patient 5 | WGS | Illumina | NM_012116   | exon1  | c.1088T  | p.R67K   | 86  | 0.2107 |
| HSP1A1   | HA3765 | 6 | 11764543 | 11764543 | synonymous_SNP     | SNP | A | A | G | patient 5 | WGS | Illumina | NM_005440   | exon1  | c.14920G | p.V640V  | 101 | 0.0792 |
| HFM2     | HA3765 | 6 | 13180320 | 13180320 | non synonymous_SNP | SNP | C | C | A | patient 5 | WGS | Illumina | NM_002070   | exon7  | c.10722A | p.G242D  | 81  | 0.1481 |
| HLA-DQB1 | HA3765 | 6 | 32487172 | 32487172 | synonymous_SNP     | SNP | C | C | A | patient 5 | WGS | Illumina | NM_002125   | exon3  | c.6807A  | p.V207V  | 208 | 0.0523 |
| HLA-DQB1 | HA3765 | 6 | 32487174 | 32487174 | non synonymous_SNP | SNP | C | C | A | patient 5 | WGS | Illumina | NM_002125   | exon3  | c.6825C  | p.V207V  | 208 | 0.0805 |
| HLA-DQB1 | HA3765 | 6 | 32487028 | 32487028 | synonymous_SNP     | SNP | A | A | G | patient 5 | WGS | Illumina | NM_002125   | exon3  | c.6791C  | p.V207V  | 183 | 0.0803 |
| HLA-DRE1 | HA3765 | 6 | 32548812 | 32548812 | splicing           | SNP | T | T | C | patient 5 | WGS | Illumina |             | 0      | 0        | 0        | 287 | 0.1311 |
| HLA-DRE1 | HA3765 | 6 | 32548813 | 32548813 | non synonymous_SNP | SNP | T | T | C | patient 5 | WGS | Illumina |             | 0      | 0        | 0        | 287 | 0.1311 |
| HLA-DRE1 | HA3765 | 6 | 32548814 | 32548814 | non synonymous_SNP | SNP | T | T | C | patient 5 | WGS | Illumina | NM_002126   | exon4  | c.1479C  | p.G233S  | 99  | 0.2101 |
| HLA-DRE1 | HA3765 | 6 | 32629915 | 32629915 | non synonymous_SNP | SNP | C | C | A | patient 5 | WGS | Illumina | NM_0124961  | exon3  | c.1049C  | p.G317A  | 40  | 0.2261 |
| HLA-DRE1 | HA3765 | 6 | 32629916 | 32629916 | non synonymous_SNP | SNP | C | C | A | patient 5 | WGS | Illumina | NM_0124961  | exon3  | c.1020C  | p.G317K  | 63  | 0.2261 |
| HLA-DRE1 | HA3765 | 6 | 32713788 | 32713788 | non synonymous_SNP | SNP | C | C | A | patient 5 | WGS | Illumina | NM_002006   | exon3  | c.1753G  | p.R244E  | 179 | 0.0509 |
| HLA-DRE1 | HA3765 | 6 | 32713793 | 32713793 | non synonymous_SNP | SNP | T | T | C | patient 5 | WGS | Illumina | NM_002006   | exon3  | c.1757G  | p.R244E  | 185 | 0.0505 |
| HLA-DRE1 | HA3765 | 6 | 32713828 | 32713828 | non synonymous_SNP | SNP | C | C | A | patient 5 | WGS | Illumina | NM_002006   | exon3  | c.1650A  | p.R188E  | 189 | 0.0505 |
| HLA-DRE1 | HA3765 | 6 | 41713064 | 41713064 | non synonymous_SNP | SNP | G | G | A | patient 5 | WGS | Illumina | NM_023030   | exon1  | c.1932T  | p.S131F  | 67  | 0.0806 |
| EDGAR    | HA3765 | 6 | 47670906 | 47670906 | non synonymous_SNP | SNP | C | C | A | patient 5 | WGS | Illumina | NM_012120   | exon1  | c.1459G  | p.R746A  | 176 | 0.0505 |
| KAL1A020 | HA3765 | 6 | 8484494  | 8484494  | synonymous_SNP     | SNP | T | T | C | patient 5 | WGS | Illumina | NM_014895   | exon15 | c.14977G | p.R539E  | 119 | 0.1092 |
| FUS1     | HA3765 | 6 | 8484545  | 8484545  | synonymous_SNP     | SNP | T | T | C | patient 5 | WGS | Illumina | NM_014895   | exon15 | c.1281T  | p.R49E   | 127 | 0.1092 |
| MTHFD1L  | HA3765 | 6 | 11515586 | 11515586 | synonymous_SNP     | SNP | C | C | A | patient 5 | WGS | Illumina | NM_01242787 | exon5  | c.1281G  | p.S88C   | 117 | 0.0509 |
| TCF12    | HA3765 | 6 | 16701954 | 16701954 | non synonymous_SNP | SNP | G | G | A | patient 5 | WGS | Illumina | NM_01145121 | exon5  | c.1028A  | p.R244H  | 99  | 0.0808 |
| TCF12    | HA3765 | 6 | 17061228 | 17061228 | synonymous_SNP     | SNP | T | T | C | patient 5 | WGS | Illumina | NM_01145121 | exon5  | c.11818A | p.R760V  | 100 | 0.0808 |
| FM2      | HA3765 | 7 | 6026152  | 6026152  | non synonymous_SNP | SNP | T | T | C | patient 5 | WGS | Illumina | NM_000516   | exon1  | c.14384T | p.M422L  | 182 | 0.0709 |
| FMR3     | HA3765 | 7 | 3102391  | 3102391  | non synonymous_SNP | SNP | A | A | G | patient 5 | WGS | Illumina | NM_002710   | exon4  | c.1056A  | p.R309H  | 184 | 0.0509 |
| AMPH     | HA3765 | 7 | 3805819  | 3805819  | non synonymous_SNP | SNP | T | T | C | patient 5 | WGS | Illumina | NM_005181   | exon8  | c.1420T  | p.R207I  | 185 | 0.0509 |
| PCOL1    | HA3765 | 7 | 7412490  | 7412490  | non synonymous_SNP | SNP | T | T | C | patient 5 | WGS | Illumina | NM_012124   | exon1  | c.1028A  | p.R244H  | 73  | 0.1092 |
| GPI2     | HA3765 | 7 | 7412490  | 7412490  | synonymous_SNP     | SNP | C | C | A | patient 5 | WGS | Illumina | NM_012399   | exon9  | c.1281T  | p.D240D  | 104 | 0.1731 |
| PCYF2    | HA3765 | 7 | 9935512  | 9935512  | non synonymous_SNP | SNP | A | A | G | patient 5 | WGS | Illumina | NM_000705   | exon12 | c.11138A | p.R471I  | 184 | 0.0505 |
| AZP1     | HA3765 | 7 | 9957386  | 9957386  | non synonymous_SNP | SNP | A | A | G | patient 5 | WGS | Illumina | NM_011810   | exon1  | c.150T   | p.F20L   | 145 | 0.0481 |
| MUC12    | HA3765 | 7 | 10067101 | 10067101 | non synonymous_SNP | SNP | A | A | G | patient 5 | WGS | Illumina | NM_01164462 | exon1  | c.1318A  | p.R317L  | 141 | 0.1141 |
| MUC12    | HA3765 | 7 | 10064675 | 10064675 | synonymous_SNP     | SNP | C | C | A | patient 5 | WGS | Illumina | NM_01164462 | exon2  | c.10911A | p.R327P  | 638 | 0.0508 |
| MUC12    | HA3765 | 7 | 10064682 | 10064682 | non synonymous_SNP | SNP | C | C | A | patient 5 | WGS | Illumina | NM_01164462 | exon2  | c.13181A | p.R309K  | 638 | 0.0508 |
| MUC12    | HA3765 | 7 | 10067738 | 10067738 | non synonymous_SNP | SNP | C | C | A | patient 5 | WGS | Illumina | NM_01164462 | exon3  | c.12180T | p.R412T  | 212 | 0.0849 |
| MUC12    | HA3765 | 7 | 10067738 | 10067738 | non synonymous_SNP | SNP | C | C | A | patient 5 | WGS | Illumina | NM_01164462 | exon3  | c.12181A | p.R412T  | 212 | 0.0849 |
| MUC12    | HA3765 | 7 | 10067738 | 10067738 | non synonymous_SNP | SNP | C | C | A | patient 5 | WGS | Illumina | NM_01164462 | exon3  | c.12182A | p.R412A  | 210 | 0.0478 |
| MUC12    | HA3765 | 7 | 10067740 | 10067740 | non synonymous_SNP | SNP | G | G | A | patient 5 | WGS | Illumina | NM_01164462 | exon3  | c.10271A | p.R404S  | 212 | 0.0835 |
| MUC12    | HA3765 | 7 | 10067740 | 10067740 | non synonymous_SNP | SNP | G | G | A | patient 5 | WGS | Illumina | NM_01164462 | exon3  | c.10272A | p.R404S  | 212 | 0.0835 |
| MUC12    | HA3765 | 7 | 10067745 | 10067745 | synonymous_SNP     | SNP | T | T | C | patient 5 | WGS | Illumina | NM_01164462 | exon3  | c.1273C  | p.P90P   | 260 | 0.0962 |
| MUC12    | HA3765 | 7 | 10067745 | 10067745 | synonymous_SNP     | SNP | T | T | C | patient 5 | WGS | Illumina | NM_01164462 | exon3  | c.10271A | p.R404S  | 212 | 0.0835 |
| MUC12    | HA3765 | 7 | 10067747 | 10067747 | synonymous_SNP     | SNP | G | G | A | patient 5 | WGS | Illumina | NM_01164462 | exon3  | c.10270T | p.R390Q  | 240 | 0.0715 |
| MUC12    | HA3765 | 7 | 10067750 | 10067750 | non synonymous_SNP | SNP | T | T | C | patient 5 | WGS | Illumina | NM_01164462 | exon3  | c.1493G  | p.R705V  | 214 | 0.0835 |
| MUC12    | HA3765 | 7 | 10067756 | 10067756 | synonymous_SNP     | SNP | A | A | G | patient 5 | WGS | Illumina | NM_01164462 | exon3  | c.14289G | p.S981S  | 217 | 0.0886 |
| MUC12    | HA3765 | 7 | 10067756 | 10067756 | synonymous_SNP     | SNP | A | A | G | patient 5 | WGS | Illumina | NM_01164462 | exon3  | c.14290G | p.S981S  | 217 | 0.0886 |
| MUC12    | HA3765 | 7 | 10067759 | 10067759 | non synonymous_SNP | SNP | C | C | A | patient 5 | WGS | Illumina | NM_01164462 | exon3  | c.12911T | p.P78L   | 215 | 0.1036 |
| MUC12    | HA3765 | 7 | 10067759 | 10067759 | non synonymous_SNP | SNP | C | C | A | patient 5 | WGS | Illumina | NM_01164462 | exon3  | c.12912A | p.P78L   | 215 | 0.1036 |
| MUC12    | HA3765 | 7 | 10067759 | 10067759 | non synonymous_SNP | SNP | C | C | A | patient 5 | WGS | Illumina | NM_01164462 | exon3  | c.12913A | p.P78L   | 215 | 0.1036 |
| MUC12    | HA3765 | 7 | 10067759 | 10067759 | non synonymous_SNP | SNP | C | C | A | patient 5 | WGS | Illumina | NM_01164462 | exon3  | c.12914A | p.P78L   | 215 | 0.1036 |
| MUC12    | HA3765 | 7 | 10067759 | 10067759 | non synonymous_SNP | SNP | C | C | A | patient 5 | WGS | Illumina | NM_01164462 | exon3  | c.12915A | p.P78L   | 215 | 0.1036 |
| MUC12    | HA3765 | 7 | 10067759 | 10067759 | non synonymous_SNP | SNP | C | C | A | patient 5 | WGS | Illumina | NM_01164462 | exon3  | c.12916A | p.P78L   | 215 | 0.1036 |
| MUC12    | HA3765 | 7 | 10067759 | 10067759 | non synonymous_SNP | SNP | C | C | A | patient 5 | WGS | Illumina | NM_01164462 | exon3  | c.12917A | p.P78L   | 215 | 0.1036 |
| MUC12    | HA3765 | 7 | 10067759 | 10067759 | non synonymous_SNP | SNP | C | C | A | patient 5 | WGS | Illumina | NM_01164462 | exon3  | c.12918A | p.P78L   | 215 | 0.1036 |
| MUC12    | HA3765 | 7 | 10067759 | 10067759 | non synonymous_SNP | SNP | C | C | A | patient 5 | WGS | Illumina | NM_01164462 | exon3  | c.12919A | p.P78L   | 215 | 0.1036 |
| MUC12    | HA3765 | 7 | 10067759 | 10067759 | non synonymous_SNP | SNP | C | C | A | patient 5 | WGS | Illumina | NM_01164462 | exon3  | c.12920A | p.P78L   | 215 | 0.1036 |
| MUC12    | HA3765 | 7 | 10067759 | 10067759 | non synonymous_SNP | SNP | C | C | A | patient 5 | WGS | Illumina | NM_01164462 | exon3  | c.12921A | p.P78L   | 215 | 0.1036 |
| MUC12    | HA3765 | 7 | 10067759 | 10067759 | non synonymous_SNP | SNP | C | C | A | patient 5 | WGS | Illumina | NM_01164462 | exon3  | c.12922A | p.P78L   | 215 | 0.1036 |
| MUC12    | HA376  |   |          |          |                    |     |   |   |   |           |     |          |             |        |          |          |     |        |





Table S2: mutational details of recurrently mutated genes in study cohort

| Sample ID:   | Tumor Type            | <i>NF1</i>                | <i>SUZ12</i>     | <i>EED</i> | <i>TP53</i> | <i>CDKN2A</i> |
|--------------|-----------------------|---------------------------|------------------|------------|-------------|---------------|
| Patient1_1   | MPNST                 | I1910fs*; het loss        | E610X; het loss  | het loss   | het loss    |               |
| Patient1_2   | Atypical Neurofibroma | I1910fs*; splice site     |                  |            |             |               |
| Patient2     | MPNST                 | L847P*; het loss          |                  |            | het loss    |               |
| Patient3     | MPNST                 | M1L; het loss*            | E324X; het loss* |            |             | het loss      |
| Patient4     | MPNST                 | Y489C; het loss           | het loss         |            |             | hom loss      |
| Patient5     | MPNST                 | clinical NF1              |                  | I290fs     |             |               |
| TCGA-QQ-A8VG | MPNST                 | clinical NF1; R1362X      |                  |            |             | het loss      |
| TCGA-QQ-A8VH | MPNST                 | clinical NF1; splice site |                  |            | Y163N       |               |
| TCGA-RN-AAAQ | MPNST                 | clinical NF1              |                  |            |             | hom loss      |
| TCGA-SI-A71O | MPNST                 |                           |                  | het loss   | hom loss    |               |
| TCGA-SI-A71P | MPNST                 | clinical NF1; P504fs      |                  |            |             | het loss      |
| TCGA-SI-A71Q | MPNST                 | clinical NF1; het loss    | het loss         | het loss   | het loss    | het loss      |
| TCGA-SI-AA8C | MPNST                 | clinical NF1; het loss    | L574fs; het loss |            | het loss    | hom loss      |

\*=germline finding

het loss= predicted copy number of 1 from copy number variation analysis; hom loss = predicted copy number of 0 from copy number analysis

Brohl AS, et al. The genomic landscape of malignant peripheral nerve sheath tumors: diverse drivers of Ras pathway activation

Table S3: significant copy number variations as detected from whole exome sequencing analysis

| Sample:     | Chromosome | Start    | End       | CN predicted | ProbCall    | Relevant Gene(s)   |
|-------------|------------|----------|-----------|--------------|-------------|--------------------|
| patient 1_1 | 4          | 52709318 | 57976527  | 9            | 1           | <i>KIT, PDGFRA</i> |
| patient 1_1 | 11         | 73101730 | 134605931 | 1            | 0.962366951 | <i>EED</i>         |
| patient 1_1 | 17         | 2138984  | 18110326  | 1            | 0.990206224 | <i>TP53</i>        |
| patient 1_1 | 17         | 26898435 | 36104885  | 1            | 0.989892387 | <i>NF1, SUZ12</i>  |
| patient 2   | 17         | 2568645  | 8020315   | 1            | 0.969737767 | <i>TP53</i>        |
| patient 2   | 17         | 28990577 | 29764530  | 1            | 0.603010314 | <i>NF1</i>         |
| patient 3   | 9          | 21802701 | 23762254  | 1            | 0.998832018 | <i>CDKN2A</i>      |
| patient 3*  | 17         | 28999025 | 30380375  | 1            | 0.904650463 | <i>NF1, SUZ12</i>  |
| patient 4   | 9          | 21930980 | 22452207  | 0            | 0.999996462 | <i>CDKN2A</i>      |
| patient 4   | 17         | 29508703 | 34341463  | 1            | 0.944552336 | <i>NF1, SUZ12</i>  |

\*germline finding

Brohl AS, et al. The genomic landscape of malignant peripheral nerve sheath tumors: diverse drivers of Ras pathway activation
